1 **DNA-PK Promotes DNA End Resection at DNA Double Strand Breaks in G<sub>0</sub> cells**

2

3 Faith C. Fowler<sup>1,2</sup>, Bo-Ruei Chen<sup>3</sup>, Nicholas Zolnerowich<sup>4</sup>, Wei Wu<sup>4</sup>, Raphael Pavani<sup>4</sup>,  
4 Jacob Paiano<sup>4</sup>, Chelsea Peart<sup>2</sup>, André Nussenzweig<sup>4</sup>, Barry P. Sleckman<sup>3\*</sup>, and Jessica  
5 K. Tyler<sup>2\*</sup>

6

7 <sup>1</sup>Weill Cornell Medicine Pharmacology Graduate Program, New York, NY 10065, USA

8 <sup>2</sup>Weill Cornell Medicine, Department of Pathology and Laboratory Medicine, New York,  
9 NY 10065, USA

10 <sup>3</sup>Department of Medicine, Division of Hematology and Oncology, O'Neal  
11 Comprehensive Cancer Center, University of Alabama at Birmingham, Birmingham, AL,  
12 35294, USA.

13 <sup>4</sup>Laboratory of Genome Integrity, National Cancer Institute, Bethesda, MD, 20892

14

15 \*Corresponding Authors: [jet2021@med.cornell.edu](mailto:jet2021@med.cornell.edu) and [bps@uab.edu](mailto:bps@uab.edu)

16

## 17 **Abstract**

18 DNA double-strand break (DSB) repair by homologous recombination is confined to the  
19 S and G<sub>2</sub> phases of the cell cycle partly due to 53BP1 antagonizing DNA end resection  
20 in G<sub>1</sub> phase and non-cycling quiescent (G<sub>0</sub>) cells where DSBs are predominately repaired  
21 by non-homologous end joining (NHEJ). Unexpectedly, we uncovered extensive MRE11-  
22 and CtIP-dependent DNA end resection at DSBs in G<sub>0</sub> mammalian cells. A whole genome  
23 CRISPR/Cas9 screen revealed the DNA-dependent kinase (DNA-PK) complex as a key  
24 factor in promoting DNA end resection in G<sub>0</sub> cells. In agreement, depletion of FBXL12,  
25 which promotes ubiquitylation and removal of the KU70/KU80 subunits of DNA-PK from  
26 DSBs, promotes even more extensive resection in G<sub>0</sub> cells. In contrast, a requirement for  
27 DNA-PK in promoting DNA end resection in proliferating cells at the G<sub>1</sub> or G<sub>2</sub> phase of  
28 the cell cycle was not observed. Our findings establish that DNA-PK uniquely promotes  
29 DNA end resection in G<sub>0</sub>, but not in G<sub>1</sub> or G<sub>2</sub> phase cells, and has important implications  
30 for DNA DSB repair in quiescent cells.

## 31 32 **Introduction**

33 DNA double-strand breaks (DSBs) are particularly deleterious lesions which, if left  
34 unrepaired, can lead to cell death, or if repaired aberrantly, can lead to oncogenic  
35 chromosomal translocations and deletions (Jackson and Bartek 2009). Eukaryotic cells  
36 utilize two main mechanisms of DSB repair: non-homologous end joining (NHEJ), where  
37 the broken DNA ends are ligated together with minimal processing of the DNA termini;  
38 and homologous recombination (HR), which uses a homologous sequence, usually on a  
39 sister chromatid, as a template for accurate DNA repair. Because HR relies on a  
40 homologous template for accurate repair, HR is mostly restricted to S and G<sub>2</sub> phases of

41 the cell cycle when sister chromatids exist. On the other hand, cells can employ NHEJ in  
42 any phase of the cell cycle and it is the only option in quiescent ( $G_0$ ) cells and  $G_1$  phase  
43 cells (Scully et al. 2019).

44 Extensive DNA end resection of the broken DNA ends, which generates long tracts  
45 of 3' ssDNA overhangs at DSBs, is a critical step in committing the cell to use HR to repair  
46 DSBs. DNA end resection is initiated by nucleases MRE11 and CtIP, and subsequently  
47 extended by nucleases including EXO1 and DNA2/BLM (Paull and Gellert 1998; Trujillo  
48 et al. 1998; Sartori et al. 2007; Gravel et al. 2008; Mimitou and Symington 2008; Zhu et  
49 al. 2008; Bunting et al. 2010). The 3' ssDNA overhangs are quickly bound by the single-  
50 stranded binding protein trimer replication protein A (RPA) to stabilize and protect the  
51 ssDNA, and later in repair RPA is replaced by the RAD51 recombinase protein that leads  
52 to the homology search to find a homologous template to achieve accurate HR repair  
53 (Sugiyama and Kowalczykowski 2002; San Filippo et al. 2008; Wright et al. 2018). NHEJ  
54 is initiated by the KU70/KU80 heterodimer binding to broken DNA ends (Zahid et al.  
55 2021). KU70/KU80 recruits the DNA-dependent protein kinase catalytic subunit (DNA-  
56 PKcs) which together form a complex called DNA-PK (Gottlieb and Jackson 1993;  
57 Hammarsten and Chu 1998). Once the DNA-PK complex is formed, the KU heterodimer  
58 translocates inwards along the DNA and DNA-PKcs remains at the DNA ends,  
59 undergoing activation via conformational changes mediated by autophosphorylation of  
60 the ABCDE cluster (Yaneva et al. 1997; Chen et al. 2021b). Recent cryo-EM structures  
61 of DNA-PK also implicate dimerization of DNA-PK as important in recruiting downstream  
62 NHEJ factors by bringing broken DNA ends together (Chaplin et al. 2021; Zha et al. 2021).  
63 In addition to autophosphorylation, DNA-PKcs phosphorylates members of the NHEJ

64 machinery, including the KU heterodimer, XRCC4, XLF, and Artemis (Bartlett and Lees-  
65 Miller 2018).

66         The critical bifurcation point in the choice to use HR or NHEJ to repair DSBs is the  
67 processing of broken DNA ends to form single-stranded 3' DNA overhangs, which blocks  
68 NHEJ and commits the cell to HR (Symington and Gautier 2011). Therefore, DNA end  
69 resection is tightly regulated to prevent aberrant DNA end resection in  $G_0$  and  $G_1$  phase  
70 cells, where NHEJ is the major DSB repair pathway. Several factors have been identified  
71 as critical DNA end protection factors that limit resection of DNA DSBs including 53BP1,  
72 RIF1, and the Shieldin complex. The proposed mechanism of action of 53BP1 and its  
73 downstream effectors include acting as a physical barrier to protect DNA ends from  
74 nucleases and promoting DNA polymerase  $\alpha$  activity to quickly fill in any resected ends  
75 (Dev et al. 2018; Mirman et al. 2018; Noordermeer et al. 2018; Setiাপutra and Durocher  
76 2019; Paiano et al. 2021). Additionally, KU70/KU80 has also been shown in budding  
77 yeast *Saccharomyces cerevisiae* to inhibit DNA end resection in  $G_1$  and  $G_2$  phases of the  
78 cell cycle, and in S phase in mammalian cells (Lee et al. 1998; Clerici et al. 2008; Shao  
79 et al. 2012).

80         While nuclease activity is largely limited in  $G_0/G_1$  phase cells to prevent aberrant  
81 DNA end resection, evidence exists suggesting that nuclease-mediated DNA end  
82 processing occurs at some DSBs in  $G_0/G_1$ . For example, Artemis is required to open  
83 hairpin-sealed DNA ends generated during V(D)J recombination in lymphocytes (Menon  
84 and Povirk 2016). Additionally, DNA end resection has been observed in  $G_1$  phase after  
85 DNA damage at complex DNA lesions (Averbeck et al. 2014; Biehs et al. 2017),  
86 suggesting that DNA end resection is not completely inhibited in the absence of sister

87 chromatids. To investigate what additional factors may regulate DNA end resection in  
88 cells lacking sister chromatids, we performed a genome-wide CRISPR/Cas9 screen for  
89 genes whose inactivation either increases or decreases RPA bound to chromatin after  
90 irradiation (IR) in G<sub>0</sub>-arrested murine cells. We discovered, unexpectedly, that KU70,  
91 KU80, and DNA-PKcs promote extensive DNA end resection in G<sub>0</sub> cells, but not in G<sub>1</sub> or  
92 G<sub>2</sub> phases of the cell cycle.

93

## 94 **Results**

### 95 **RPA associates with IR-induced DNA DSBs in G<sub>0</sub> cells:**

96 Murine pre-B cells transformed with Abelson murine leukemia virus (termed abl  
97 pre-B cells hereafter) continuously proliferate *in vitro* and can be efficiently arrested in G<sub>0</sub>,  
98 also referred to as the quiescent state, upon treatment with the abl kinase inhibitor  
99 imatinib (Figure S1A) (Bredemeyer et al. 2006; Chen et al. 2021a). To investigate how  
100 DNA end resection is regulated in G<sub>0</sub> cells, we used a flow cytometric approach to assay  
101 RPA bound to chromatin after detergent extraction of soluble RPA, as a proxy for ssDNA  
102 generated at DSBs after exposing cells to irradiation (IR) (Forment et al. 2012; Chen et  
103 al. 2021a). This assay was performed in abl pre-B cell lines deficient in DNA Ligase IV  
104 (*Lig4*<sup>-/-</sup>), to maximize our ability to detect chromatin-bound RPA at DSBs, given that  
105 completion of NHEJ is prevented in the absence of DNA Ligase IV. We also performed  
106 the analysis in *Lig4*<sup>-/-</sup>:*53bp1*<sup>-/-</sup> abl pre-B cells which lack the DNA end protection protein  
107 53BP1 and accumulate high levels of RPA on chromatin after IR (Chen et al. 2021a). In  
108 agreement with our previous work, we detected a high level of chromatin-bound RPA in  
109 G<sub>0</sub>-arrested *Lig4*<sup>-/-</sup>:*53bp1*<sup>-/-</sup> abl pre-B cells after IR, consistent with the role of 53BP1 in  
110 DNA end protection (Figure 1A). Surprisingly, we also observed RPA associated with  
111 chromatin after IR of G<sub>0</sub>-arrested *Lig4*<sup>-/-</sup> abl pre-B cells, although at lower levels than in  
112 *Lig4*<sup>-/-</sup>:*53bp1*<sup>-/-</sup> abl pre-B cells (Figure 1A). Moreover, the increase in IR-induced  
113 chromatin-bound RPA does not require DNA Ligase IV deficiency as we were able to  
114 observe similar results using the RPA flow cytometric assay in wild-type (WT) abl pre-B  
115 cells arrested in G<sub>0</sub> (Figure S1B). These data indicate that extensive DNA end resection

116 occurs at DSBs in G<sub>0</sub> cells, despite the presence of the DNA end protection proteins  
117 53BP1 and KU70/KU80.

118 To determine whether higher levels of chromatin-bound RPA in irradiated G<sub>0</sub>-  
119 arrested *Lig4*<sup>-/-</sup> abl pre-B cells is a result of DNA end resection, we depleted the nucleases  
120 that are required for the initiation of DNA end resection during HR in cycling cells. We  
121 found that the depletion of CtIP or MRE11 reduced the levels of RPA on chromatin in  
122 irradiated G<sub>0</sub>-arrested *Lig4*<sup>-/-</sup> abl pre-B cells (Figure 1B and S1C), indicating that the RPA  
123 we observe with our flow cytometric assay after IR is indeed a result of DNA end  
124 resection.

125 To determine whether the DNA end resection that we observed was unique to abl  
126 pre-B cells or not, we performed the RPA flow cytometric chromatin association assay in  
127 the human breast epithelial cell line MCF10A. We arrested the MCF10A cells in G<sub>0</sub> by  
128 EGF deprivation (Chen et al. 2021a). Similar to *Lig4*<sup>-/-</sup> and WT abl pre-B cells in G<sub>0</sub>, we  
129 observed IR-induced chromatin-bound RPA in G<sub>0</sub> MCF10A cells (Figure S1D), consistent  
130 with DNA end resection occurring in these cells at DSBs. RPA binding to ssDNA  
131 surrounding DSBs often form distinct nuclear foci that can be easily detected by  
132 immunofluorescence staining and microscopy analysis (Golub et al. 1998). Therefore, we  
133 performed immunofluorescence staining for RPA in EGF-deprived MCF10A cells. We  
134 observed discrete IR-induced RPA foci, consistent with the RPA associated with ssDNA  
135 accumulating at DNA damage sites (Figure 1C). Together, these results suggest that  
136 broken DNA ends are resected in a CtIP and MRE11-dependent manner, leading to RPA  
137 accumulation on ssDNA in G<sub>0</sub> mammalian cells.

138

139 **DNA end resection and RPA loading occurs at site-specific DSBs in G<sub>0</sub> cells:**

140 As irradiation induces DNA base lesions and single-stranded DNA breaks in  
141 addition to DSBs, it could potentially complicate our analysis of DNA end processing at  
142 regions surrounding DSBs. Therefore, we investigated DSBs at specific locations in the  
143 mouse genome upon induction of the *AsiSI* endonuclease. We performed RPA chromatin  
144 immunoprecipitation sequencing (RPA ChIP-seq) after induction of *AsiSI* DSBs in G<sub>0</sub>-  
145 arrested *Lig4*<sup>-/-</sup> *abl* pre-B cells. We detected RPA binding adjacent to *AsiSI* DSBs,  
146 consistent with ssDNA generated by resection around DNA DSBs (Paiano et al. 2021)  
147 (Figure 1D and S1E). Moreover, the association of RPA with chromatin was strand  
148 specific around the DSBs, consistent with the 5'-3' nature of DNA end resection which  
149 generates 3' ssDNA overhangs (Paiano et al. 2021) (Figure 1D). To determine the extent  
150 of DNA end processing in G<sub>0</sub> cells, we performed END-seq (Canela et al. 2016; Wong et  
151 al. 2021) to directly measure DNA end resection at nucleotide resolution at *AsiSI*-induced  
152 DSBs. Using END-seq, we detected extensive DNA end resection in G<sub>0</sub>-arrested *Lig4*<sup>-/-</sup>  
153 *abl* pre-B cells at 4 and 8 hours after *AsiSI* DSB induction (Figure 1E). Together, these  
154 data indicate that in G<sub>0</sub>-arrested cells, DNA ends are resected at DSBs induced by IR or  
155 site-specific endonucleases, generating ssDNA that is bound by RPA.

156

157 **A CRISPR/Cas9 screen identifies the DNA-PK complex as promoting DNA end**  
158 **resection in G<sub>0</sub> cells:**

159 To identify factors that influence DNA end resection in G<sub>0</sub> cells, we performed a  
160 genome-wide CRISPR/Cas9 screen in G<sub>0</sub>-arrested *Lig4*<sup>-/-</sup> *abl* pre-B cells 2 hours after  
161 irradiation to identify factors that either promote or impair DNA end resection (Figure 2A).



162 We isolated the 10% of cells with the lowest RPA (low RPA) and the 10% cells with the  
163 highest RPA (high RPA) staining intensity using our RPA flow cytometric assay followed  
164 by flow assisted cell sorting. We then amplified the guide RNAs (gRNAs) in these  
165 populations of cells and determined their frequencies using high throughput sequencing.  
166 gRNAs enriched in the low RPA staining population correspond to genes encoding  
167 proteins that normally promote DNA end resection, while gRNAs enriched in the high RPA  
168 population correspond to genes encoding proteins that normally impair resection. In this  
169 screen we identified several gRNAs enriched in the low RPA staining population to *Rbbp8*  
170 which encodes the nuclease CtIP, and *Nbn*, which encodes the NBN subunit of the  
171 MRE11-RAD50-NBN (MRN) complex, consistent with their established roles in promoting  
172 DNA end resection (Figure 2B). Unexpectedly, we also found gRNAs of *Ku70*, *Ku80*, and  
173 *Prkdc* (the gene encoding DNA-PKcs) highly enriched in our low RPA population (Figure  
174 2B). This suggested that DNA-PK may promote DNA end resection in G<sub>0</sub> cells, contrary  
175 to the established role of these factors in preventing DNA end resection in other phases  
176 of the cell cycle.

177 To validate the screen and determine if DNA-PK is required for DNA end resection,  
178 we generated *Lig4<sup>-/-</sup>:Prkdc<sup>-/-</sup>* abl pre-B cells that do not express DNA-PKcs by  
179 CRISPR/Cas9-mediated gene inactivation (Figure S2A). G<sub>0</sub>-arrested *Lig4<sup>-/-</sup>:Prkdc<sup>-/-</sup>* abl  
180 pre-B cells had lower levels of chromatin-bound RPA after IR compared to *Lig4<sup>-/-</sup>* abl pre-  
181 B cells (Figure 2C). DNA-PKcs and Ataxia-telangiectasia mutated (ATM) are two major  
182 serine/threonine kinases that are activated in response to DNA DSBs and share some  
183 overlapping functions due to similar substrate specificity (Blackford and Jackson 2017).  
184 Because DNA-PKcs but not ATM was identified in our screen, we wanted to determine if

185 the pro-resection activity in G<sub>0</sub>-arrested cells is unique to DNA-PKcs or also shared by  
186 ATM. We treated G<sub>0</sub>-arrested *Lig4*<sup>-/-</sup> abl pre-B cells with the ATM inhibitor KU55933 or the  
187 DNA-PKcs inhibitor NU7441 before IR and performed flow cytometric analysis of IR-  
188 induced chromatin-bound RPA. In contrast to the consistent reduction in the levels of  
189 chromatin-bound RPA observed in G<sub>0</sub>-arrested *Lig4*<sup>-/-</sup> abl pre-B cells treated with DNA-  
190 PKcs inhibitor, ATM inhibition did not have a detectable effect on the levels of IR-induced  
191 binding of RPA in G<sub>0</sub>-arrested *Lig4*<sup>-/-</sup> abl pre-B cells (Figure 2D and S2B). The role of  
192 DNA-PK in promoting DNA end resection in G<sub>0</sub> is not limited to murine abl pre-B cells as  
193 we also observed a reduced number of IR-induced RPA foci in G<sub>0</sub>-arrested human  
194 MCF10A cells upon inhibition of DNA-PKcs (Figure S2C). These results indicate that  
195 DNA-PKcs activity, but not ATM, uniquely promotes resection and RPA binding to  
196 damaged chromatin after IR in G<sub>0</sub> cells.

197 To directly observe if DNA-PKcs influenced DNA end resection at DSBs, we  
198 performed nucleotide resolution END-seq on G<sub>0</sub>-arrested *Lig4*<sup>-/-</sup> abl pre-B cells with and  
199 without DNA-PKcs inhibitor treatment before the induction of *AsiS*/DSBs. Consistent with  
200 our RPA flow cytometric assay results, DNA-PKcs inhibitor-treated G<sub>0</sub>-arrested *Lig4*<sup>-/-</sup> abl  
201 pre-B cells showed greatly reduced END-Seq signals distal to DSBs, consistent with  
202 limited DNA end processing when DNA-PK is inactivated (Figure 2E and S2D). These  
203 results demonstrate that DNA-PK activity promotes DNA end resection of DSBs in G<sub>0</sub>  
204 mammalian cells.

205

206 **FBXL12 inhibits KU70/KU80-dependent DNA end resection in G<sub>0</sub> cells:**

207           Given that DNA-PKcs promotes DNA end resection in G<sub>0</sub> cells (Figure 2C, 2D,  
208 2E), and that *Ku70* and *Ku80* were enriched in the low RPA loading population of cells in  
209 the CRISPR/Cas9 screen (Figure 2B), we determined whether KU70/KU80 may also  
210 promote resection in G<sub>0</sub> cells. We generated *Lig4*<sup>-/-</sup>:*Ku70*<sup>-/-</sup> abl pre-B cells and measured  
211 DNA end resection using our RPA flow cytometric approach. Consistent with our  
212 observations in DNA-PK inhibitor-treated G<sub>0</sub>-arrested *Lig4*<sup>-/-</sup> abl pre-B cells and *Lig4*<sup>-/-</sup>  
213 :*Prkdc*<sup>-/-</sup> abl pre-B cells, the level of chromatin-bound RPA after IR was greatly reduced  
214 in G<sub>0</sub>-arrested *Lig4*<sup>-/-</sup>:*Ku70*<sup>-/-</sup> abl pre-B cells compared to *Lig4*<sup>-/-</sup> abl pre-B cells (Figure 3A  
215 and S3A). As such, the entire DNA-PK complex is required for DNA end resection in G<sub>0</sub>  
216 cells.

217           KU70/KU80 is removed from DSBs via ubiquitylation, which has been shown to be  
218 mediated by E3 ligases including RNF138, RNF8, RNF126, and the SCF<sup>Fbx112</sup> complex  
219 (Postow et al. 2008; Feng and Chen 2012; Postow and Funabiki 2013; Ismail et al. 2015;  
220 Ishida et al. 2017). In agreement, gRNAs of *Fbx112*, which encodes the substrate  
221 recognition subunit FBXL12 of the SCF<sup>Fbx112</sup> E3 ubiquitin ligase complex, were highly  
222 enriched in our screen in the high RPA staining cell population (Figure 2B), consistent  
223 with the idea that the persistent presence of KU70/KU80 at DSBs in cells lacking FBXL12  
224 would lead to persistent DNA end resection. Indeed, we observed that in G<sub>0</sub>-arrested *Lig4*<sup>-/-</sup>  
225 :*Fbx112*<sup>-/-</sup> abl pre-B cells, the level of IR-induced chromatin-bound RPA increased  
226 compared to *Lig4*<sup>-/-</sup> abl pre-B cells (Figure 3B and Fig S3B). Given the role of FBXL12 on  
227 limiting the levels of KU70/KU80 at broken DNA ends, we tested whether the increased  
228 DNA end resection phenotype in *Lig4*<sup>-/-</sup>:*Fbx112*<sup>-/-</sup> abl pre-B cells depended on DNA-PK  
229 activity or the presence of the KU70/KU80 complex. Indeed, inhibition of DNA-PK with

230 NU7441 (Figure 3C) and depletion of KU70 (Figure 3D and Fig S3C) in G<sub>0</sub>-arrested *Lig4*  
231 *-/-:Fbxl12*<sup>-/-</sup> abl pre-B cells prevented excessive accumulation of RPA on chromatin after  
232 IR. Our results suggest that the ability of DNA-PK to promote DNA end resection in G<sub>0</sub>  
233 cells is regulated through maintaining proper levels of KU70/KU80 at DNA DSBs by the  
234 SCF<sup>Fbxl12</sup> E3 ubiquitylation complex.

235

### 236 **DNA-PK uniquely promotes DNA end resection exclusively in G<sub>0</sub> cells:**

237 KU70/KU80 have been shown to prevent DNA end resection in G<sub>1</sub> and G<sub>2</sub> phases  
238 in budding yeast and in S phase in mammalian cells but has not been examined in G<sub>0</sub>  
239 cells (Lee et al. 1998; Clerici et al. 2008; Shao et al. 2012). Thus, we set out to determine  
240 whether DNA-PK-dependent DNA end resection is limited to G<sub>0</sub> or can occur in other  
241 phases of the cell cycle. To this end, we compared the levels of IR-induced chromatin  
242 bound RPA in *Lig4*<sup>-/-</sup>, *Lig4*<sup>-/-:Prkdc</sup><sup>-/-</sup> and *Lig4*<sup>-/-:Ku70</sup><sup>-/-</sup> abl pre-B cells arrested in G<sub>0</sub> by  
243 imatinib, arrested in G<sub>2</sub> by the CDK1 inhibitor RO3306, and in G<sub>1</sub> phase (cells with 2N  
244 DNA) in a proliferating population. In contrast to G<sub>0</sub> cells, loss of DNA-PKcs (*Lig4*<sup>-/-:Prkdc</sup>  
245 <sup>-/-</sup>) did not reduce the levels of IR-induced chromatin-bound RPA in G<sub>2</sub>-arrested or cycling  
246 G<sub>1</sub> phase cells (Figure 4A and S4A). Similar results were obtained when analyzing *Lig4*  
247 <sup>-/-:Ku70</sup><sup>-/-</sup> abl pre-B cells (Figure 4B). The unique function of DNA-PK activity in promoting  
248 DNA end resection in G<sub>0</sub>-arrested cells was confirmed with END-seq analysis of *AsiSI*-  
249 induced DSBs in *Lig4*<sup>-/-</sup> abl pre-B cells arrested in G<sub>0</sub> or G<sub>2</sub> and treated with or without  
250 DNA-PKcs inhibitor. Whereas G<sub>0</sub>-arrested *Lig4*<sup>-/-</sup> abl pre-B cells treated with DNA-PKcs  
251 inhibitor exhibited significantly reduced END-seq signals in regions distal to the DSBs,  
252 the same treatment had little effect in cells arrested in G<sub>2</sub> phase of the cell cycle (Figure

253 4C and S4B). These results suggest that DNA-PK distinctly promotes DNA end resection  
254 at DSBs in G<sub>0</sub> but not in other cell cycle phases.  
255

## 256 Discussion

257 DNA end resection is one of the key events that determines whether cells utilize  
258 NHEJ, HR, or other repair pathways utilizing homologous sequences. During G<sub>0</sub> and G<sub>1</sub>  
259 phase of the cell cycle, NHEJ is the predominant DSB repair pathway and DNA end  
260 resection is largely limited compared to other phases of the cell cycle. However, in this  
261 study we revealed that DNA end resection dependent on CtIP and MRE11, which are  
262 required for resection in S and G<sub>2</sub> phases of the cell cycle, occurs at DSBs in G<sub>0</sub>  
263 mammalian cells (Figures 1B). In addition to CtIP and MRE11, we identified additional  
264 factors that promote resection in G<sub>0</sub> cells as components of the DNA-PK complex,  
265 including KU70, KU80 and DNA-PKcs, in a genome-wide CRISPR/Cas9 screen and  
266 showed that the kinase activity of DNA-PK is critical as resection of DSBs diminishes  
267 upon DNA-PKcs inhibitor treatment (Figures 2 and 3). Interestingly, we also found in our  
268 genome-wide CRISPR/Cas9 screen that inactivating FBXL12, the substrate recognition  
269 subunit of the SCF<sup>FBXL12</sup> E3 ubiquitin ligase complex, promotes extensive resection of  
270 DNA ends in G<sub>0</sub> cells (Figure 3B). As the SCF<sup>FBXL12</sup> E3 ubiquitin is thought to limit the  
271 abundance of the KU70/KU80 heterodimer (Postow and Funabiki 2013), our data are in  
272 line with the notion that loss of FBXL12 results in aberrant accumulation of KU70/KU80  
273 at DSBs, and consequently elevated or prolonged activation of DNA-PK at DSBs which  
274 promotes resection in G<sub>0</sub> cells (Figure 5).

275 Why would resection occur in G<sub>0</sub> cells? Chemical modifications or secondary  
276 structures at DSBs have been identified as requiring DNA end processing to create a  
277 more accessible repair environment, which could presumably be the case at DSBs in G<sub>0</sub>  
278 cells (Weinfeld and Soderlind 1991). For example, Artemis is an endo and exonuclease

279 which is activated by DNA-PKcs and uses its nuclease activity to open DNA hairpins at  
280 coding ends, which is required for V(D)J recombination, and cleaves 3' ssDNA overhangs  
281 during NHEJ (Ma et al. 2002; Ma et al. 2005). Though Artemis was not identified in our  
282 screen as having a role in G<sub>0</sub> DSB repair, it serves as an example of nuclease activity  
283 being critical for DSB repair outside of HR. Interestingly, DNA end resection has a role in  
284 recruiting anti-resection factors to limit extensive DNA end resection. The SHLD2  
285 component of Shieldin binds ssDNA, suppresses RAD51 loading, and ultimately recruits  
286 53BP1 to DSBs (Noordermeer et al. 2018). HELB, a 5'-3' DNA helicase, binds to RPA  
287 and limits EXO1 and BLM-DNA2-mediated DNA end resection (Tkáč et al. 2016). Limited  
288 DNA end resection in G<sub>0</sub> cells could be important in preventing extensive DNA end  
289 resection. Altogether, we propose that DNA end resection in G<sub>0</sub> cells is likely not resulting  
290 in aberrant HR but may be required to create more accessible DNA ends and/or to recruit  
291 anti-resection factors.

292         Studies investigating the role of KU70/KU80 during DSB repair have found that  
293 KU70/KU80 protects DSBs from nuclease activity. For example, at HO endonuclease  
294 breaks in budding yeast, deletion of KU70/KU80 leads to ssDNA accumulation in G<sub>1</sub> cells  
295 and increased MRE11 recruitment to DSBs compared to wild-type cells (Lee et al. 1998;  
296 Clerici et al. 2008). Also in budding yeast, at inducible I-SceI DSBs, deletion of KU70  
297 results in increased RFA1 foci formation in G<sub>1</sub>, but deletion of NHEJ factor DNA Ligase  
298 IV leads to no defect in RFA1 foci formation compared to wild-type cells, indicating that  
299 KU70 itself, not NHEJ, is a barrier to DNA end resection (Barlow et al. 2008). In  
300 mammalian cells, complementation of KU70/KU80 knockout cells with a *M. tuberculosis*  
301 KU homolog persistently bound to DSBs in S phase results in reduced RPA and RAD51

302 foci formation after IR (Shao et al. 2012). Contrary to these roles for KU70/KU80 in  
303 protecting DNA ends from nucleolytic attack, we found that in G<sub>0</sub> cells, KU70/KU80  
304 promotes DNA end resection (Figure 3A and 4B). We hypothesize that KU70/KU80  
305 promotes resection through recruitment and activation of DNA-PKcs at DSBs (Gottlieb  
306 and Jackson 1993), as we also found that DNA-PKcs inhibition and genetic deletion of  
307 *Prkdc* leads to more RPA on chromatin after IR and more DNA end resection in G<sub>0</sub> cells  
308 (Figure 2C-E, S2C, S2D, 4A, 4C). It is important to note that most studies establishing  
309 the role of KU70/KU80 in protecting DNA ends were performed in *S. cerevisiae* which do  
310 not have a homolog to DNA-PKcs. Therefore, we hypothesize that the function of DNA-  
311 PK promoting DNA end resection in G<sub>0</sub> cells may not be evolutionarily conserved.  
312 Moreover, previous studies in *S. cerevisiae* and mammalian cells establishing DNA-PK  
313 as a pro-NHEJ complex did not analyze G<sub>0</sub> cells. We found that DNA-PK does not  
314 promote DNA end resection in G<sub>1</sub> or G<sub>2</sub> phase cells, only in G<sub>0</sub>-arrested cells, indicating  
315 that DNA-PK-dependent DNA end resection is unique to G<sub>0</sub>, but is not contradictory to its  
316 anti-resection function in G<sub>1</sub> or G<sub>2</sub> phase cells (Figure 4). In G<sub>0</sub> cells, KU70/KU80 could  
317 protect some DNA ends, but after recruitment and activation of DNA-PKcs, the net effect  
318 is DNA end resection. Additional studies may elucidate how the balance between DNA  
319 end protection and DNA end resection is regulated in G<sub>0</sub>.

320         ATM and DNA-PK have been shown to have some overlapping functions in DNA  
321 damage response and repair, including phosphorylation of H2A.X in response to IR and  
322 signal join formation during V(D)J recombination (Stiff et al. 2004; Zha et al. 2011).  
323 However, we find that this is not the case during DNA end resection in G<sub>0</sub> cells as DNA-  
324 PK promotes resection in G<sub>0</sub> cells, but ATM does not have a detectable impact (Figure



325 S2B). ATM has been implicated in promoting HR repair by phosphorylating CtIP and  
326 promoting KU removal from DSBs, as well as phosphorylating DNA-PKcs at single-ended  
327 DSBs to remove it from these breaks that require DNA end resection (Wang et al. 2013;  
328 Britton et al. 2020). DNA-PKcs autophosphorylation promotes HR by removing it from  
329 DSBs to allow nuclease access, but is typically associated with promoting NHEJ by  
330 phosphorylating Artemis, XRCC4, and XLF (Zhou and Paull 2013; Bartlett and Lees-Miller  
331 2018) So while ATM often promotes DNA end resection and HR, it appears that DNA-  
332 PKcs could be acting in place of ATM to promote DNA end resection in G<sub>0</sub> cells. It is  
333 additionally possible that DNA-PKcs phosphorylates a unique substrate(s) in G<sub>0</sub> cells that  
334 promotes DNA end resection.

335 In summary, we provide here evidence that DNA-PK promotes DNA end resection  
336 uniquely in G<sub>0</sub> cells, and that this DNA end resection is counteracted by FBXL12. We  
337 speculate that some aspects of DSB repair in G<sub>0</sub> function differently than DSB repair in  
338 cycling cells, and future studies may reveal the mechanism and utility of these key  
339 differences.

340

341

342

343

**Figure 1**

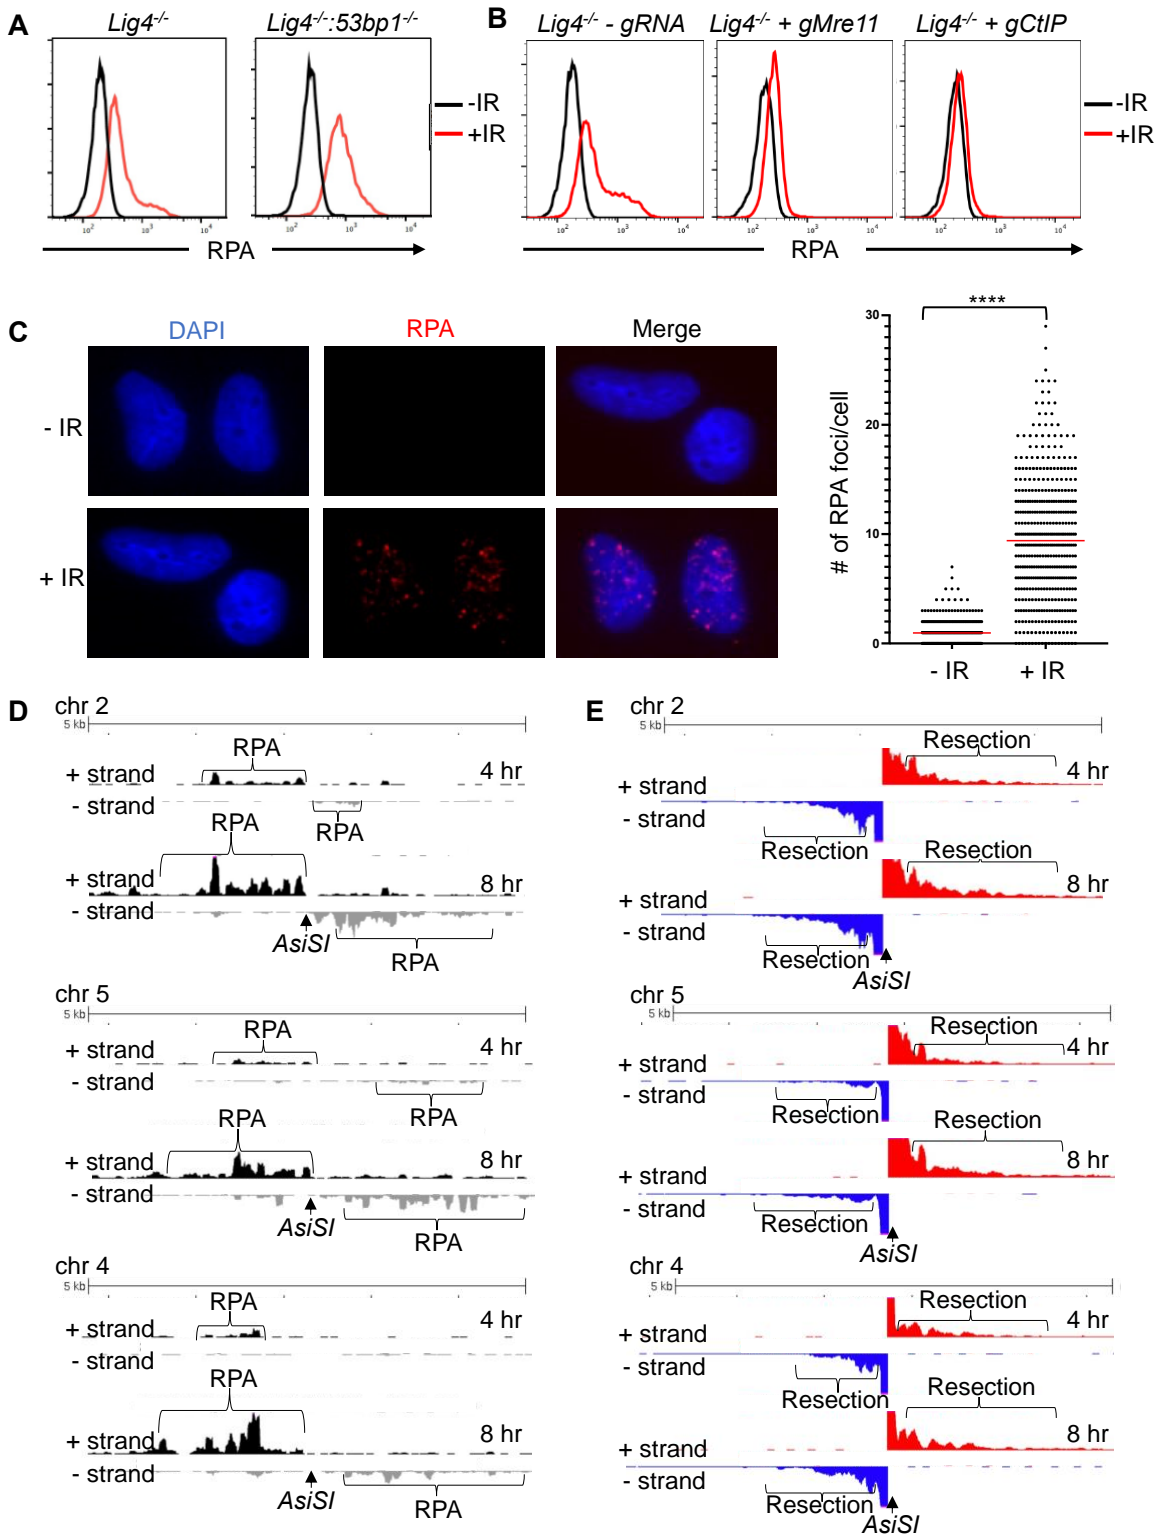

344  
345  
346  
347

348 **Figure 1. RPA is loaded onto ssDNA after DSBs in G<sub>0</sub> mammalian cells**

349 (A) Flow cytometric analysis of chromatin-bound RPA in G<sub>0</sub>-arrested *Lig4*<sup>-/-</sup> and *Lig4*<sup>-/-</sup>  
350 *:53bp1*<sup>-/-</sup> abl pre-B cells before and 3 hours after 20 Gray IR. Representative of three  
351 independent experiments. (B) Flow cytometric analysis of chromatin-bound RPA before  
352 and 2 hours after 15 Gy IR in G<sub>0</sub>-arrested abl pre-B *Lig4*<sup>-/-</sup> cells (left), *Lig4*<sup>-/-</sup> cells  
353 depleted of *Mre11* (middle), and *Lig4*<sup>-/-</sup> cells depleted of *CtIP* (right). Representative of  
354 three independent experiments. (C) Representative images and quantification of IR-  
355 induced RPA foci from 3 independent experiments in G<sub>0</sub>-arrested MCF10A cells before  
356 and 3 hours after 10 Gray IR. n=365 cells in No IR and n=433 cells in IR. Red bars  
357 indicate average number of RPA foci in No IR=0.96 and average number of RPA foci in  
358 IR=9.4 (\*\*\*\*p<0.0001, unpaired t test). (D) RPA ChIP-seq tracks at *AsiS1* DSBs on  
359 chromosome 2, 5, and 4 at 4 hours (top) and 8 hours (bottom) after *AsiS1* endonuclease  
360 induction in G<sub>0</sub>-arrested *Lig4*<sup>-/-</sup> abl pre-B cells. (E) Representative END-Seq tracks  
361 showing resection at *AsiS1* DSBs at chromosome 2, 5, and 4 at 4 hours (top) and 8  
362 hours (bottom) after *AsiS1* induction in G<sub>0</sub>-arrested *Lig4*<sup>-/-</sup> abl pre-B cells. END-seq data  
363 is representative from two independent experiments.

**Figure S1**

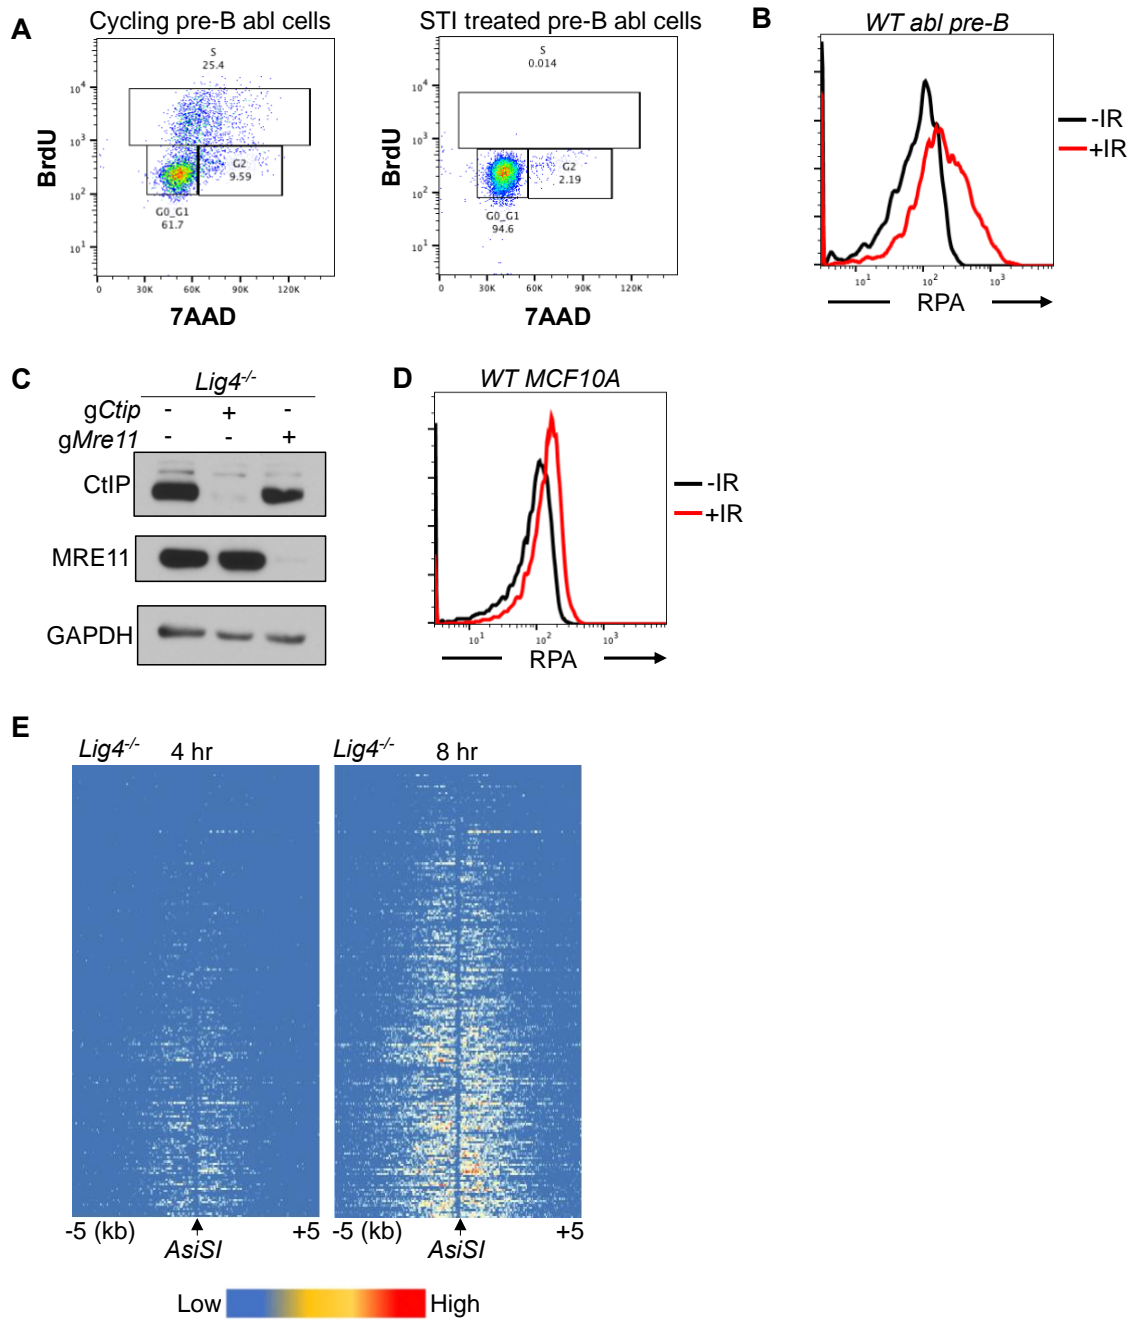

364

365

366 **Figure S1. RPA is loaded onto ssDNA after DSBs in G<sub>0</sub> mammalian cells**

367 (A) Flow cytometric analysis of cycling and STI treated *Lig4*<sup>-/-</sup> abl pre-B cells for BrdU

368 content (y-axis) and DNA content (7AAD, x-axis). (B) Flow cytometric analysis of

369 chromatin-bound RPA in wild-type G<sub>0</sub>-arrested abl pre-B cells before and 3 hours after

370 20 Gray IR. (C) Western blot of bulk CtIP and MRE11 knockout in *Lig4*<sup>-/-</sup> abl pre-B cells

371 (D) Flow cytometric analysis of chromatin-bound RPA loading in wild-type G<sub>0</sub>-arrested

372 MCF10A cells before and 3 hours after 20 Gray IR. (E) Heat maps of RPA ChIP-seq

373 results at top 200 *AsiSI* sites in G<sub>0</sub>-arrested *Lig4*<sup>-/-</sup> abl pre-B cells 4 hours (left) and 8

374 hours (right) after *AsiSI*-endonuclease induction.

375

376

377

378

**Figure 2**

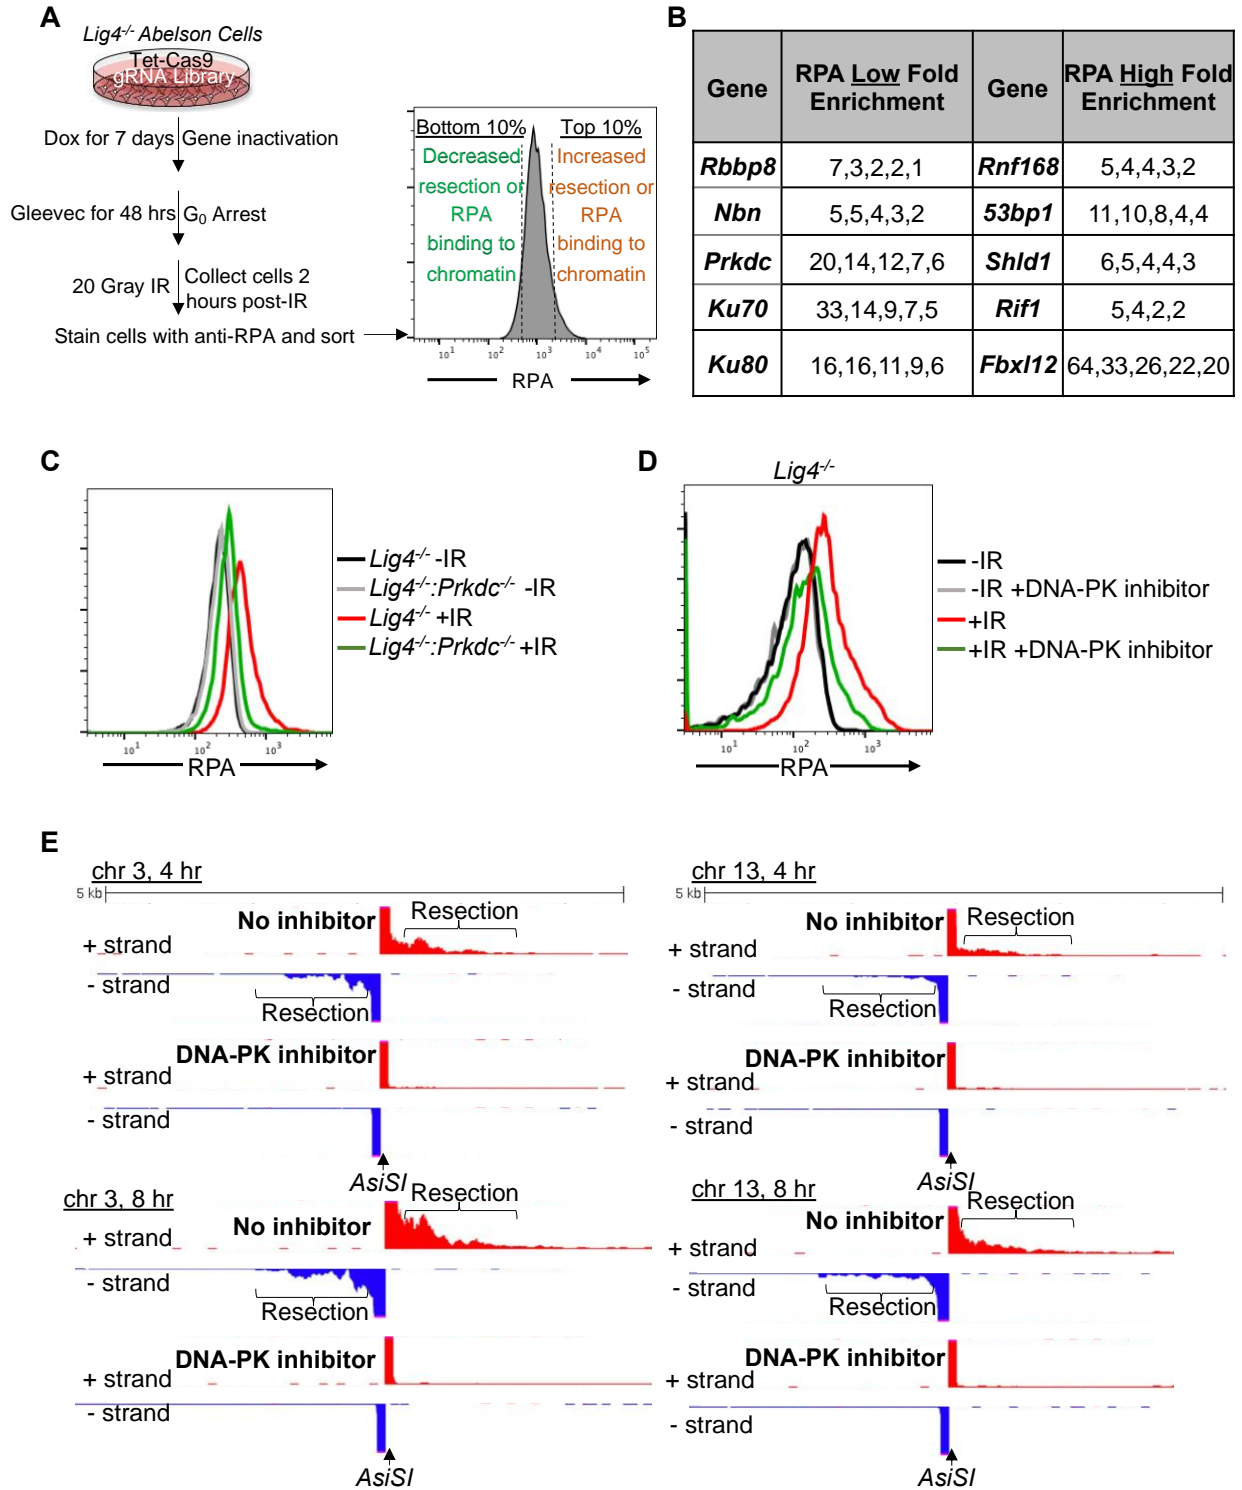

379  
 380

381 **Figure 2. A genome-wide gRNA screen identifies DNA-PK as a factor that**  
382 **promotes DNA end resection in G<sub>0</sub>**

383 (A) Schematic of genome-wide guide RNA screen for factors promoting (low RPA) or  
384 inhibiting (high RPA) chromatin-bound RPA loading 2 hours after 20 Gray IR in G<sub>0</sub>-  
385 arrested *Lig4*<sup>-/-</sup> abl pre-B cells. (B) Fold enrichment of selected guide RNAs in low RPA  
386 high RPA populations. (C) Flow cytometric analysis of chromatin-bound RPA in G<sub>0</sub>-  
387 arrested *Lig4*<sup>-/-</sup> and *Lig4*<sup>-/-</sup>:*Prkdc*<sup>-/-</sup> abl pre-B cells before and 3 hours after 15 Gray IR.  
388 Data is representative of three independent experiments in two different cell lines. (D)  
389 Flow cytometric analysis of chromatin-bound RPA in G<sub>0</sub>-arrested *Lig4*<sup>-/-</sup> abl pre-B cells  
390 with and without 10 μm NU7441 (DNA-PKcs inhibitor) pre-treatment 1 hour before 20  
391 Gray IR. Data is representative of three independent experiments in two different cell  
392 lines. (E) Representative END-seq tracks at chromosome 3 (left) and chromosome 13  
393 (right) in G<sub>0</sub>-arrested *Lig4*<sup>-/-</sup> abl pre-B cells 4 hours (top) and 8 hours (bottom) after *AsiSI*/  
394 DSB induction, with and without 10 μm NU7441 treatment.

395

396

397

398



**Figure S2**

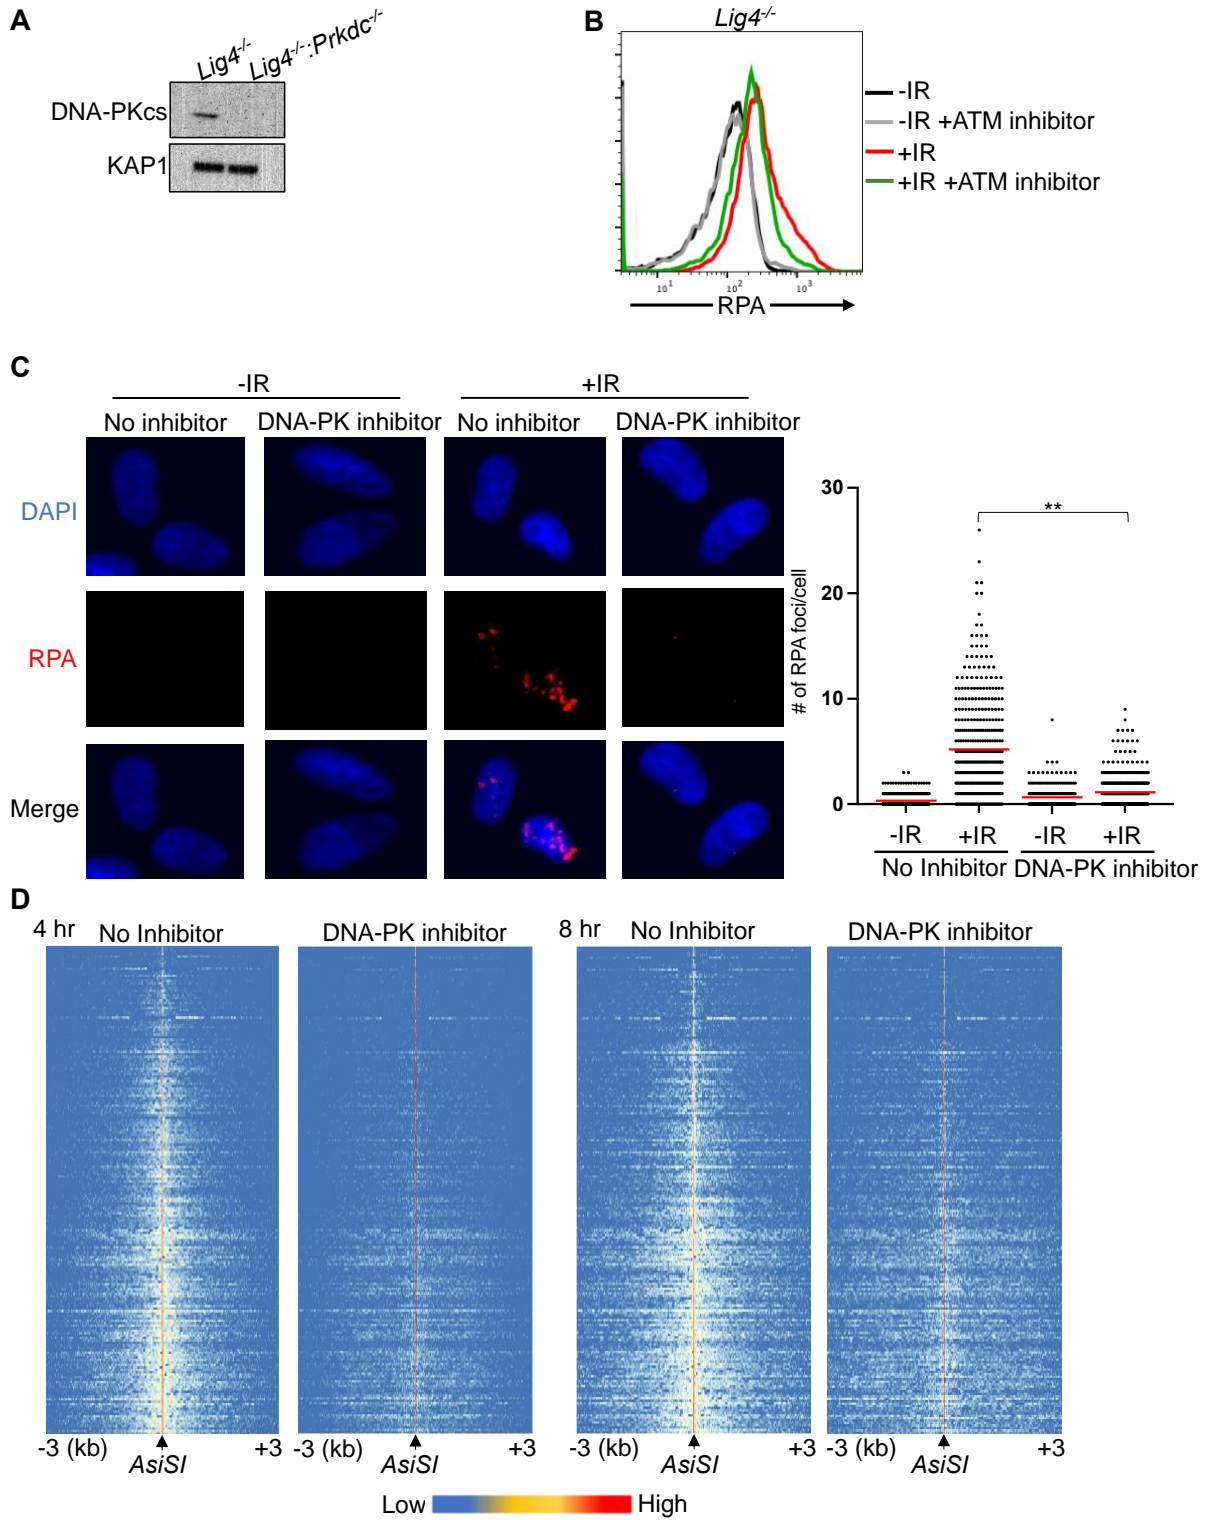

399  
400



401 **Figure S2. A genome-wide gRNA screen identifies DNA-PK as a factor that**  
402 **promotes DNA end resection in G<sub>0</sub>**  
403 (A) Western blot analysis of DNA-PKcs protein in *Lig4*<sup>-/-</sup> and *Lig4*<sup>-/-</sup>:*Prkdc*<sup>-/-</sup> abl pre-B  
404 cells. (B) Flow cytometric analysis of chromatin-bound RPA in G<sub>0</sub>-arrested abl pre-B  
405 cells with and without 1 hour pre-treatment with 15 μm KU-55933 (ATM inhibitor), before  
406 and 3 hours after 20 Gray IR. (C) Representative images and quantitation from 3  
407 independent experiments of IR-induced RPA foci in G<sub>0</sub>-arrested MCF10A cells with and  
408 without 10 μm NU7441, before and 3 hours after 10 Gray IR. For No Inhibitor -IR  
409 condition, n=426, average number of RPA foci=0.34. For No Inhibitor +IR condition,  
410 n=389, average number of RPA foci=5.2. For DNA-PK inhibitor treated -IR condition,  
411 n=266, average number of RPA foci=0.66. For DNA-PK inhibitor treated +IR condition,  
412 n=441, average number of RPA foci=1.13. Red bar indicates mean number of RPA foci  
413 (\*\*p=0.003). (D) Heat maps of END-seq at top 200 *AsiS1* DSBs with and without 10 μm  
414 NU7441 treatment in G<sub>0</sub>-arrested *Lig4*<sup>-/-</sup> abl pre-B cells 4 hours (left) and 8 hours (right)  
415 after *AsiS1* DSB induction.

416

417

418

419

420

421

422

423

424

**Figure 3**

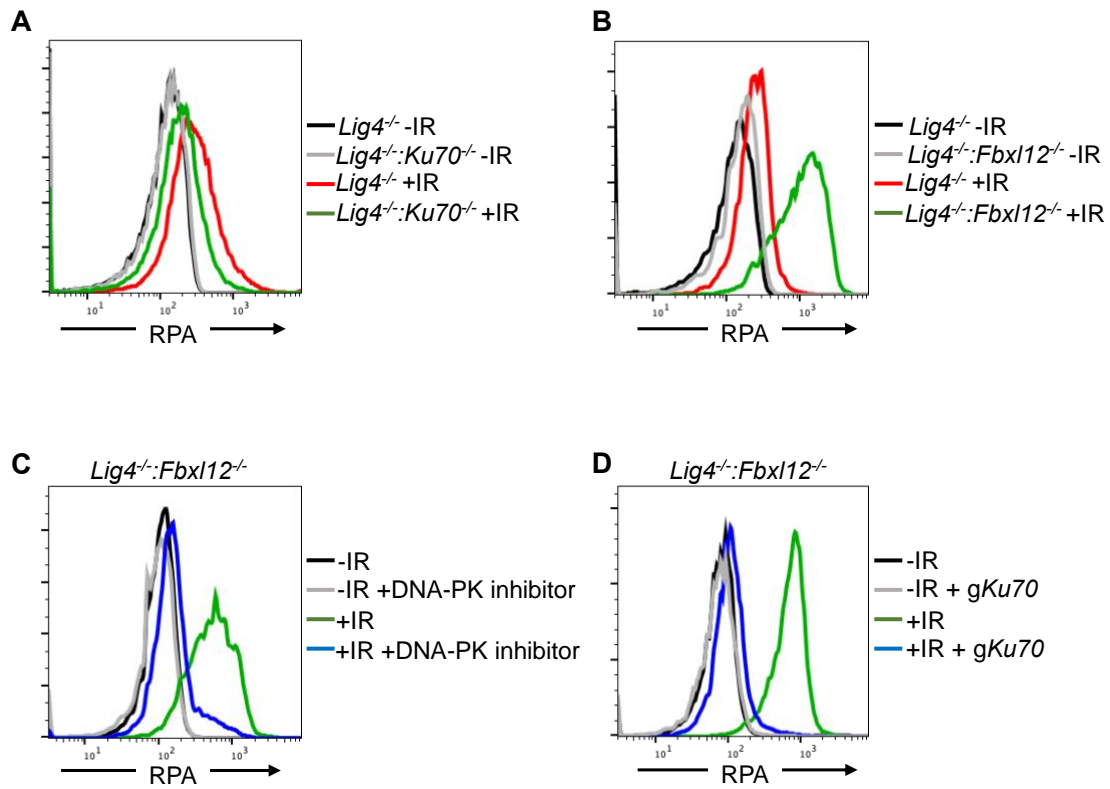

425  
426  
427  
428

429 **Figure 3. FBXL12 inhibits KU70/KU80-promoted DNA end resection**

430 (A) Flow cytometric analysis of chromatin-bound RPA in G<sub>0</sub>-arrested *Lig4*<sup>-/-</sup> abl pre-B

431 cells vs *Lig4*<sup>-/-</sup>:*Ku70*<sup>-/-</sup> abl pre-B cells before and 3 hours after 20 Gray IR. Data is

432 representative of three independent experiments in two different cell lines. (B) As in A,

433 in G<sub>0</sub>-arrested *Lig4*<sup>-/-</sup> and *Lig4*<sup>-/-</sup>:*Fbxl12*<sup>-/-</sup> abl pre-B cells. Data is representative of three

434 independent experiments in at least two different cell lines. (C). Flow cytometric analysis

435 of chromatin-bound RPA in G<sub>0</sub>-arrested *Lig4*<sup>-/-</sup>:*Fbxl12*<sup>-/-</sup> abl pre-B cells with and without

436 10 μm NU7441 treatment, before and 3 hours after 20 Gray IR. Data is representative of

437 three independent experiments in at least two different cell lines (D) Flow cytometric

438 analysis of chromatin-bound RPA in G<sub>0</sub>-arrested *Lig4*<sup>-/-</sup>:*Fbxl12*<sup>-/-</sup> abl pre-B cells before

439 and after KU70 knockout, before and 3 hours after 15 Gray IR. Data is representative of

440 three independent experiments.

441

442

443

444

### Figure S3

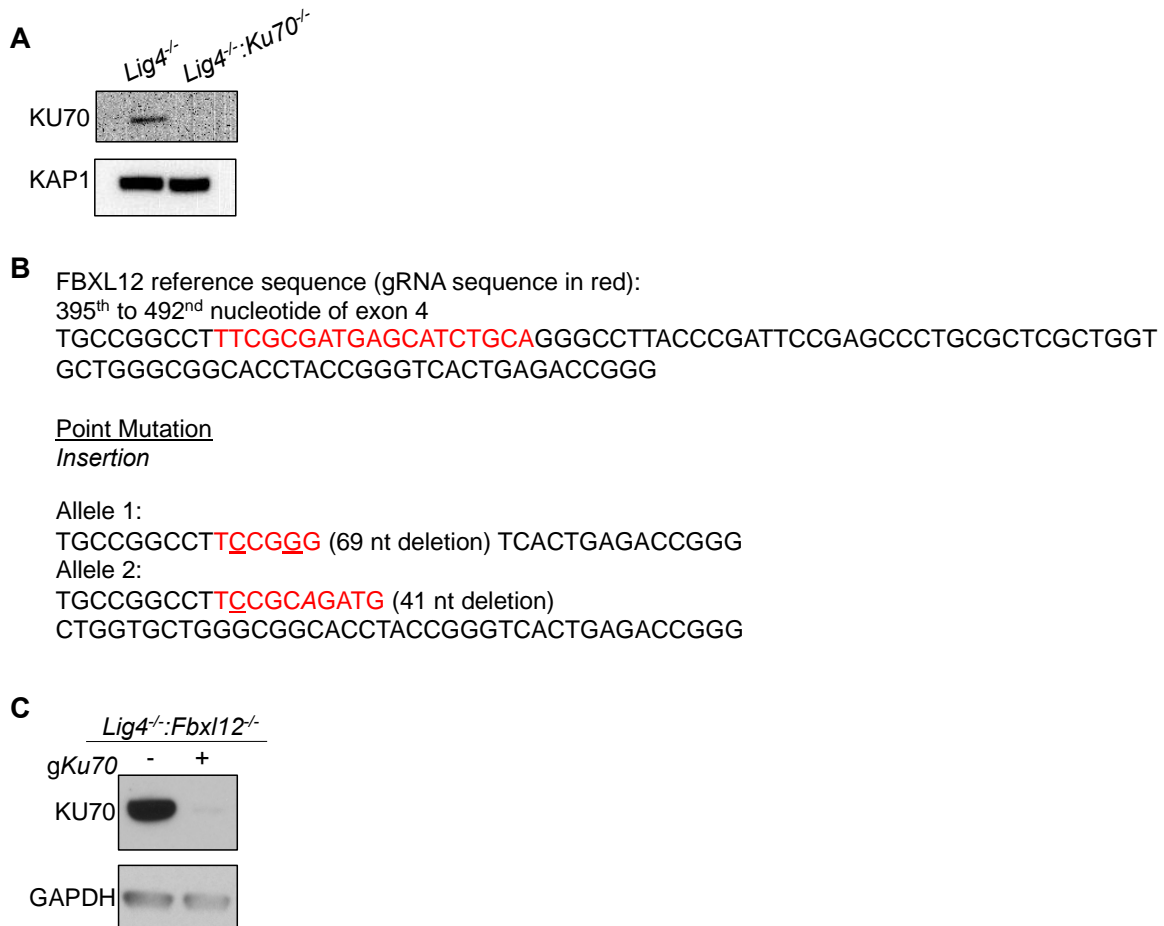

445  
446  
447  
448

449 **Figure S3. FBXL12 inhibits KU70/KU80-promoted DNA end resection**

450 (A) Western blot analysis of KU70 protein in *Lig4*<sup>-/-</sup> and *Lig4*<sup>-/-</sup>:*Ku70*<sup>-/-</sup> abl pre-B cells.

451 (B) Gene sequence of *Lig4*<sup>-/-</sup>:*Fbxl12*<sup>-/-</sup> abl pre-B cell clones indicating deletions. (C)

452 Western blot analysis of KU70 protein in *Lig4*<sup>-/-</sup>:*Fbxl12*<sup>-/-</sup> abl pre-B cells.

453

**Figure 4**

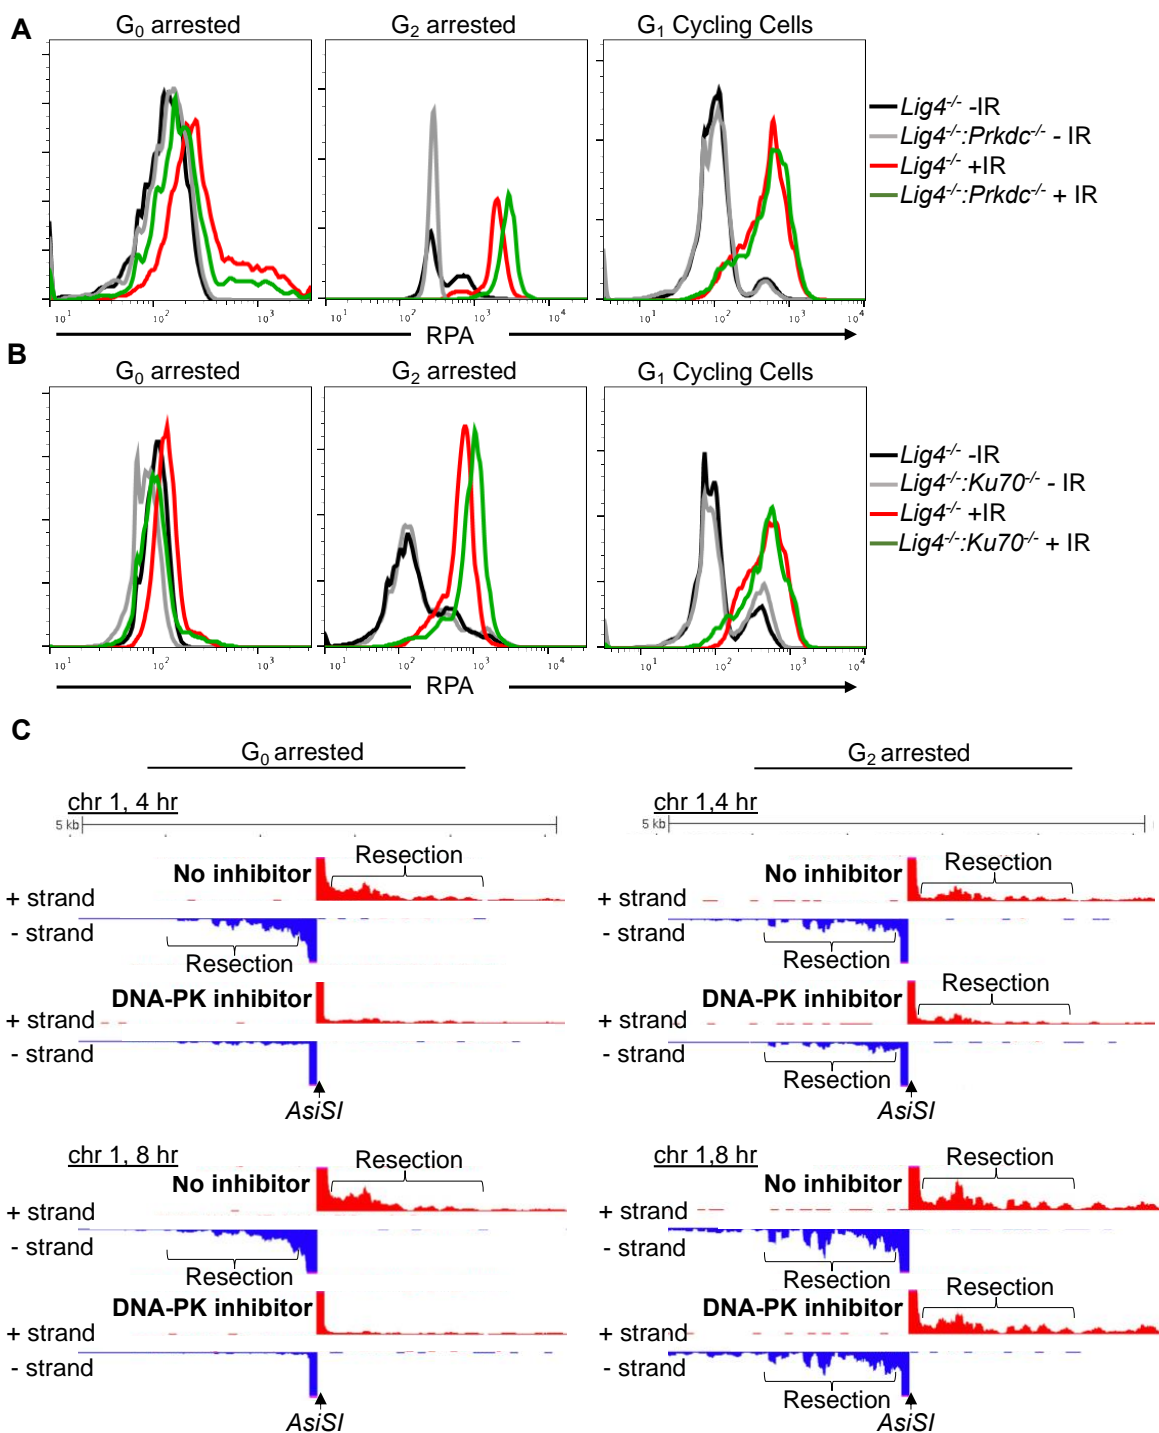

454  
455  
456  
457

458 **Figure 4. DNA-PK mediates DNA end resection in G<sub>0</sub> but not G<sub>1</sub> or G<sub>2</sub>**

459 (A) Flow cytometric analysis of chromatin-bound RPA in *Lig4*<sup>-/-</sup> and *Lig4*<sup>-/-</sup>:*Prkdc*<sup>-/-</sup> abl pre-  
460 B cells arrested in G<sub>0</sub> (left), arrested in G<sub>2</sub> by 10 μm RO-3306 treatment for 16 hours and  
461 gated on 4N (middle), and G<sub>1</sub> cells gated on 2N DNA content in cycling cells (right), before  
462 and 3 hours after 20 Gray IR. Data is representative of three independent experiments in  
463 at least two different cell lines. (B) As in A in *Lig4*<sup>-/-</sup> and *Lig4*<sup>-/-</sup>:*Ku70*<sup>-/-</sup> abl pre-B cells. (C)  
464 Representative END-seq tracks in G<sub>0</sub> (left) and G<sub>2</sub>-arrested (right, by 10 μm RO-3306  
465 treatment for 16 hours) *Lig4*<sup>-/-</sup> abl pre-B cells, with and without 10 μm NU7441 treatment  
466 on chromosome 1, 4 hours (top) and 8 hours (bottom) after *AsiS1* endonuclease induction.

467

468

469

470

471

472

473

474

475

476

477

478

479

**Figure S4**

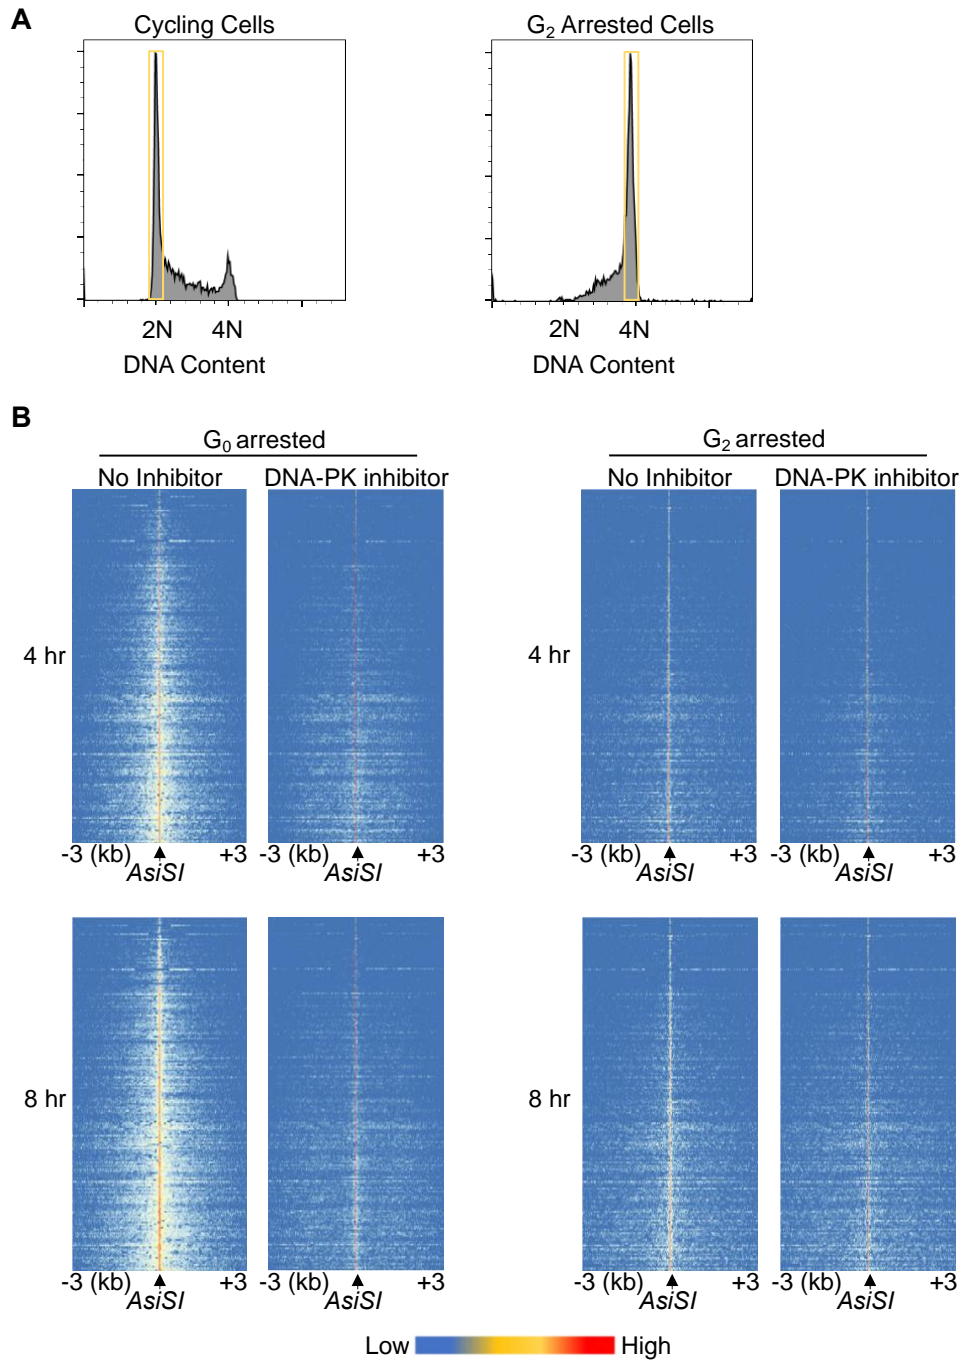

480

481



482 **Figure S4. DNA-PK mediates DNA end resection in G<sub>0</sub> but not G<sub>1</sub> or G<sub>2</sub>**

483 (A) Flow cytometric analysis of DNA content (7AAD) in RO-3306 treated (right) and  
484 cycling cells (left) showing gating used for RPA flow cytometry analysis. (B) Heat maps  
485 of END-seq at top 200 *AsiSI* DSBs in G<sub>0</sub>-arrested *Lig4*<sup>-/-</sup> abl pre-B (left) and G<sub>2</sub>-arrested  
486 *Lig4*<sup>-/-</sup> abl pre-B (right) 4 hours (top) and 8 hours (bottom) after *AsiSI* DSB induction, with  
487 and without 10 μm NU7441 treatment.

488

489

Figure 5

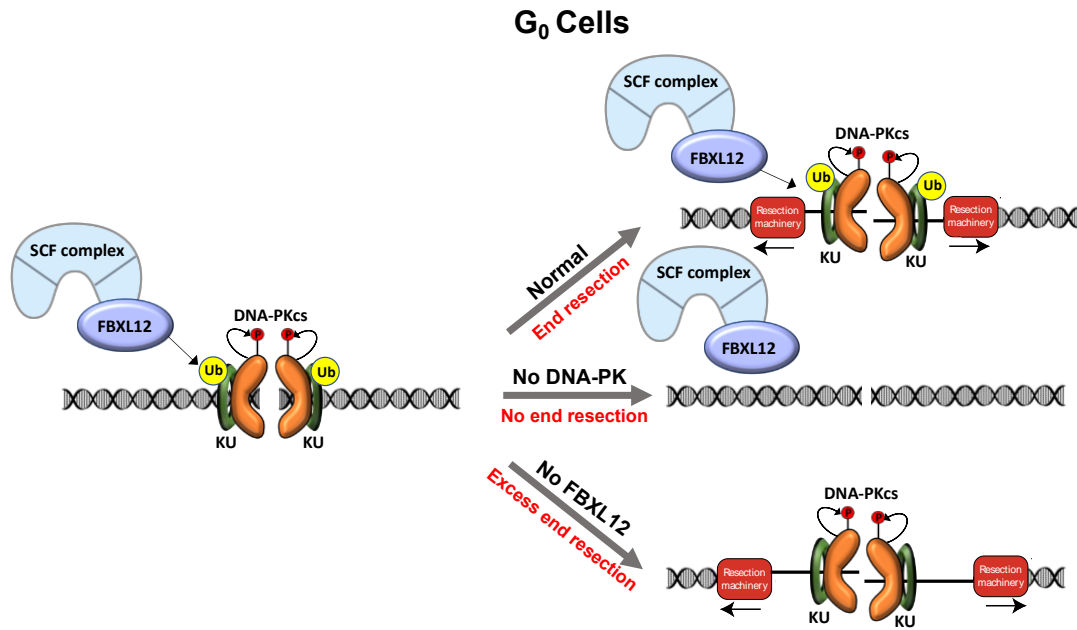

490

491

492 **Figure 5. Model of DNA-PK-mediated DNA end resection in G<sub>0</sub> cells**

493 Normally in G<sub>0</sub> at DSBs, the DNA-PK complex promotes DNA end resection. This  
494 resection is counteracted by FBXL12. Without DNA-PK, there is no DNA end resection  
495 in G<sub>0</sub>. Without FBXL12, DNA-PK persists at DSBs which leads to more extensive DNA  
496 end resection.  
497

498 **Materials and Methods**

| <b>Key Resources Table</b>                |                                            |                            |                                                 |                                         |
|-------------------------------------------|--------------------------------------------|----------------------------|-------------------------------------------------|-----------------------------------------|
| <b>Reagent type (species) or resource</b> | <b>Designation</b>                         | <b>Source or reference</b> | <b>Identifiers</b>                              | <b>Additional information</b>           |
| Antibody                                  | Anti-CtIP (Rabbit polyclonal)              | N/A                        | custom made (Richard Baer, Columbia University) | WB (1:1000)                             |
| Antibody                                  | Anti-MRE11 (Rabbit polyclonal)             | Novus Biologicals          | NB100-142<br>RRID:AB_1109376                    | WB (1:2000)                             |
| Antibody                                  | Anti-GAPDH (GAPDH-71.1) (Mouse monoclonal) | Millipore Sigma            | G8795<br>RRID:AB_1078991                        | WB (1:10000)                            |
| Antibody                                  | Anti-KAP1 (N3C2) (Rabbit polyclonal)       | Genetex                    | GTX102226<br>RRID:AB_2037324                    | WB (1:2000)                             |
| Antibody                                  | Anti-RPA32 (4E4) (Rat monoclonal)          | Cell Signaling Technology  | 2208S<br>RRID:AB_2238543                        | WB (1:1000)<br>FC (1:200)<br>IF (1:500) |
| Antibody                                  | Anti-KU70 (D10A7) (Rabbit monoclonal)      | Cell Signaling Technology  | 4588S<br>RRID:AB_11179211                       | WB (1:1000)                             |
| Antibody                                  | Anti-DNA-PK (SC57-08) (Rabbit monoclonal)  | Invitrogen                 | MA5-32192<br>RRID:AB_2809479                    | WB (1:1000)                             |
| Antibody                                  | Anti-RPA32                                 | Abcam                      | ab10359<br>RRID:AB_297095                       | ChIP (10 ug)                            |
| Antibody                                  | HRP, goat anti-mouse                       | Promega                    | W4021<br>RRID:AB_430834                         | WB (1:5000)                             |
| Antibody                                  | HRP, goat anti-rabbit IgG                  | Promega                    | W4011<br>RRID:AB_430833                         | WB (1:5000)                             |
| Antibody                                  | Alexa Fluor 488, goat anti-rat IgG         | BioLegend                  | 405418<br>RRID:AB_2563120                       | FC (1:500)                              |

|                                  |                                                                                        |             |                               |                        |
|----------------------------------|----------------------------------------------------------------------------------------|-------------|-------------------------------|------------------------|
| Antibody                         | Alexa Fluor 647, goat anti-rat IgG                                                     | BioLegend   | 405416<br>RRID:AB_2562967     | FC (1:500)             |
| Antibody                         | Alexa Fluor 594, goat anti-rat IgG                                                     | BioLegend   | 405422<br>RRID:AB_2563301     | IF (1:500)             |
| Recombinant DNA                  | pCW-Cas9 (plasmid)                                                                     | Addgene     | 50661<br>RRID:Addgene_50661   |                        |
| Recombinant DNA                  | pKLV-U6 gRNA(BbsI)-PGKpuro-2ABFP (plasmid)                                             | Addgene     | 50946<br>RRID:Addgene_50946   |                        |
| Recombinant DNA                  | Genome-wide CRISPR guide RNA library V2 (plasmid)                                      | Addgene     | 67988<br>RRID:Addgene_67988   |                        |
| Cell line ( <i>H. sapiens</i> )  | <i>MCF10A</i>                                                                          | ATCC        | CRL-10317<br>RRID:CVCL_0598   |                        |
| Cell line ( <i>H. sapiens</i> )  | <i>MCF10A:iCas9</i>                                                                    | This study  | Clone 25                      | Available upon request |
| Cell line ( <i>M. musculus</i> ) | WT: <i>iCas9</i> abl pre-B cells                                                       | This study  | M63.1.MG36. <i>iCas9</i> .302 | Available upon request |
| Cell line ( <i>M. Musculus</i> ) | <i>Lig4<sup>-/-</sup></i> : <i>iCas9</i> abl pre-B cells                               | This study  | A5.83.MG9. <i>iCas9</i> .16   | Available upon request |
| Cell line ( <i>M. Musculus</i> ) | <i>Lig4<sup>-/-</sup></i> : <i>iCas9</i> abl pre-B cells                               | This study  | A5.115. <i>iCas9</i> .72      | Available upon request |
| Cell line ( <i>M. Musculus</i> ) | <i>Lig4<sup>-/-</sup></i> : <i>53bp1</i> : <i>iCas9</i> abl pre-B cells                | This study  | Clone 82                      | Available upon request |
| Cell line ( <i>M. musculus</i> ) | <i>Lig4<sup>-/-</sup></i> : <i>Ku70<sup>-/-</sup></i> : <i>iCas9</i> abl pre-B cells   | This study  | Clones 134 and 140            | Available upon request |
| Cell line ( <i>M. musculus</i> ) | <i>Lig4<sup>-/-</sup></i> : <i>Prkdc<sup>-/-</sup></i> : <i>iCas9</i> abl pre-B cells  | This study  | Clone 6                       | Available upon request |
| Cell line ( <i>M. musculus</i> ) | <i>Lig4<sup>-/-</sup></i> : <i>Fbxl12<sup>-/-</sup></i> : <i>iCas9</i> abl pre-B cells | This study  | Clone 6                       | Available upon request |
| Cell line ( <i>M. musculus</i> ) | <i>Lig4<sup>-/-</sup></i> : <i>AsiSl</i> abl pre-B cells                               | This study  | Clone 20                      | Available upon request |
| Chemical compound, drug          | Imatinib                                                                               | Selleckchem | S2475                         |                        |

|                         |                           |                                                                                               |                           |                                                                    |
|-------------------------|---------------------------|-----------------------------------------------------------------------------------------------|---------------------------|--------------------------------------------------------------------|
| Chemical compound, drug | Doxycycline               | Sigma-Aldrich                                                                                 | D9891                     |                                                                    |
| Chemical compound, drug | Polybrene                 | Sigma Aldrich                                                                                 | S2667                     |                                                                    |
| Chemical compound, drug | Lipofectamine 2000        | Thermo Fisher Scientific                                                                      | 11668019                  |                                                                    |
| Chemical compound, drug | NU7441                    | Selleck Chemicals                                                                             | S2638                     |                                                                    |
| Chemical compound, drug | KU-55933                  | Selleck Chemicals                                                                             | S1092                     |                                                                    |
| Chemical compound, drug | EGF                       | PeptoTech                                                                                     | AF-100-15                 |                                                                    |
| Chemical compound, drug | Hydrocortisone            | Sigma-Aldrich                                                                                 | H-0888                    |                                                                    |
| Chemical compound, drug | Cholera Toxin             | Sigma-Aldrich                                                                                 | C-8052                    |                                                                    |
| Chemical compound, drug | Insulin                   | Sigma-Aldrich                                                                                 | I-1882                    |                                                                    |
| Commercial assay or kit | 7-AAD (DNA stain)         | BD Biosciences                                                                                | 559925<br>RRID:AB_2869266 |                                                                    |
| Commercial assay or kit | Cytofix/Cytoperm solution | BD Biosciences                                                                                | 554722<br>RRID:AB_2869010 |                                                                    |
| Commercial assay or kit | Perm/Wash Buffer          | BD Biosciences                                                                                | 554723<br>RRID:AB_2869011 |                                                                    |
| Commercial assay or kit | FITC BrdU Flow Kit        | BD Biosciences                                                                                | 559619<br>RRID:AB_2617060 |                                                                    |
| Sequence-based reagent  | pKLV lib330F              | This study (designed based on (Tzelepis et al. 2016))                                         | PCR primers               | AATGGACTATCA<br>TATGCTTACCGT                                       |
| Sequence-based reagent  | pKLV lib490R              | This study (designed based on (Tzelepis et al. 2016))                                         | PCR primers               | CCTACCGGTGGA<br>TGTGGAATG                                          |
| Sequence-based reagent  | PE.P5_pKLV lib195 Fwd     | This study (designed based on (Tzelepis et al. 2016) and standard Illumina adaptor sequences) | PCR primers               | AATGATACGGCG<br>ACCACCGAGATC<br>TGGCTTTATATAT<br>CTTGTGGAAGG<br>AC |

|                        |                             |                                                                                               |                 |                                                                                                                                                                                  |
|------------------------|-----------------------------|-----------------------------------------------------------------------------------------------|-----------------|----------------------------------------------------------------------------------------------------------------------------------------------------------------------------------|
| Sequence-based reagent | P7 index180 Rev             | This study (designed based on (Tzelepis et al. 2016) and standard Illumina adaptor sequences) | PCR primers     | CAAGCAGAAGAC<br>GGCATACGAGAT<br><i>INDEX</i> TGACTG<br>GAGTTCAGACGT<br>GTGCTCTTCCGA<br>TCCAGACTGCCT<br>TGGGAAAAGC                                                                |
| Sequence-based reagent | BU1                         | (Canela et al. 2016)                                                                          | PCR primers     | 5'-Phos-<br>GATCGGAAGAG<br>CGTCGT<br>GTAGGGAAAGA<br>GTGUU[Biotin-<br>dT]U [Biotin-<br>dT]UUACACTCTT<br>TC<br>CCTACACGACGC<br>TCTTCCGATC* T-<br>3'<br>[*phosphorothioate<br>bond] |
| Sequence-based reagent | BU2                         | (Canela et al. 2016)                                                                          | PCR primers     | 5'-Phos-<br>GATCGGAAGAG<br>CACACG<br>TCUUUUUUUUAG<br>ACGTGTGCTCTT<br>CCGATC*T-3'<br>[*phosphorothioate<br>bond]                                                                  |
| Sequence-based reagent | <i>53bp1</i> gRNA sequence  | Sequence is from (Tzelepis et al. 2016)                                                       | N/A             | GAACCTGTCAGA<br>CCCGATC                                                                                                                                                          |
| Sequence-based reagent | <i>Ctip</i> gRNA sequence   | Sequence is from (Tzelepis et al. 2016)                                                       | N/A             | ATTAACCGGCTA<br>CGAAAGA                                                                                                                                                          |
| Sequence-based reagent | <i>Mre11</i> gRNA sequence  | Sequence is from (Tzelepis et al. 2016)                                                       | N/A             | TGCCGTGGATAC<br>TAAATAC                                                                                                                                                          |
| Sequence-based reagent | <i>Prkdc</i> gRNA sequence  | Sequence is from (Tzelepis et al. 2016)                                                       | N/A             | ATGCGTCTTAGG<br>TGATCGA                                                                                                                                                          |
| Sequence-based reagent | <i>Ku70</i> gRNA sequence   | Sequence is from (Tzelepis et al. 2016)                                                       | N/A             | CCGAGACACGG<br>TTGGCCAT                                                                                                                                                          |
| Sequence-based reagent | <i>Fbxl12</i> gRNA sequence | Sequence is from (Tzelepis et al. 2016)                                                       | N/A             | TTCGCGATGAGC<br>ATCTGCA                                                                                                                                                          |
| Software, algorithm    | Image J                     | NIH                                                                                           | RRID:SCR_003070 |                                                                                                                                                                                  |

|                     |                                   |                         |                 |  |
|---------------------|-----------------------------------|-------------------------|-----------------|--|
| Software, algorithm | FlowJo                            | FlowJo                  | RRID:SCR_008520 |  |
| Software, algorithm | Prism                             | GraphPad                | RRID:SCR_002798 |  |
| Software, algorithm | Gen5                              | Biotek Instruments      | RRID:SCR_017317 |  |
| Software, algorithm | SeqKit                            | (Shen et al. 2016)      | RRID:SCR_018926 |  |
| Software, algorithm | Bowtie                            | (Langmead et al. 2009)  | RRID:SCR_005476 |  |
| Software, algorithm | SAMtools                          | (Li et al. 2009a)       | RRID:SCR_002105 |  |
| Software, algorithm | BEDtools                          | (Quinlan and Hall 2010) | RRID:SCR_006646 |  |
| Other               | LSRII Flow cytometer              | BD Bioscience           | RRID:SCR_002159 |  |
| Other               | FACS Celesta Flow Cytometer       | BD Bioscience           | RRID:SCR_019597 |  |
| Other               | FACSAria II Cell Sorter           | BD Bioscience           | RRID:SCR_018934 |  |
| Other               | Lionheart LX automated microscope | BioTex Instruments      | RRID:SCR_019745 |  |
| Other               | 4-D Amaxa Nucleofector            | Lonza                   | NA              |  |

499

## 500 **Cell Lines and Maintenance**

501 Abelson virus-transformed pre-B cell lines were maintained in DMEM (Thermo Fisher  
502 #11960-077) supplemented with 10% fetal bovine serum, 1% Penicillin-Streptomycin, 2  
503 mM glutamine, 1 mM sodium pyruvate, 1X nonessential amino acids, and 0.4% beta-  
504 mercaptoethanol at 37°C with 5% CO<sub>2</sub>. MCF10A cells were maintained in DMEM/F12  
505 (Gibco, #11330032), 5% horse serum, 20 ng/mL EGF, 0.5 µg/mL hydrocortisone, 100  
506 ng/mL cholera toxin, 10 µg/mL insulin, and 1% Penicillin-Streptomycin at 37°C with 5%



507 CO<sub>2</sub>. 293T cells were maintained in DMEM (Corning, #10-013-CM) supplemented with  
508 10% fetal bovine serum and 1% Penicillin-Streptomycin at 37°C with 5% CO<sub>2</sub>.  
509 *Lig4*<sup>-/-</sup> abl pre-B cells contain pCW-Cas9 (addgene, #50661) which expresses cas9  
510 under a doxycycline-induced promoter. To generate single cell clones of *Lig4*<sup>-/-</sup>:*53bp1*<sup>-/-</sup>,  
511 *Lig4*<sup>-/-</sup>:*Ku70*<sup>-/-</sup>, *Lig4*<sup>-/-</sup>:*Prkdc*<sup>-/-</sup>, and *Lig4*<sup>-/-</sup>:*Fbxl12*<sup>-/-</sup>, guide RNAs (gRNAs) against each  
512 gene were cloned into pKLV-U6gRNA-EF(BbsI)-PGKpuro2ABFP (addgene, #62348)  
513 modified to express human CD2 as a cell surface marker. *Lig4*<sup>-/-</sup> abl pre-B cells were  
514 grown in 3 µg/mL of doxycycline for 2 days and then nucleofected with the pKLV-gRNA  
515 plasmid using a Lonza Amaxa Nucleofector. The next day, cells were magnetically  
516 selected for human CD2 cell surface expression, and selected cells were grown in 3  
517 µg/mL doxycycline overnight. Serial dilution in 96 well plates was used to isolate single  
518 cells. After cell growth, potential clones were confirmed to have the gene of interest  
519 knocked out by Sanger sequencing or western blotting.

#### 520 **Bulk gene inactivation**

521 gRNAs against *Mre11*, *CtIP*, and *Ku70* were cloned into pKLV-U6gRNA-EF(BbsI)-  
522 PGKpuro2ABFP (addgene, #62348). 293T cells were transfected with the pKLV-gRNA  
523 plasmid along with lentiviral packaging and lentiviral envelope plasmids. 3 days post-  
524 transfection, supernatant containing pKLV-gRNA lentivirus was filtered with a 0.45  
525 micron filter. *Lig4*<sup>-/-</sup> cells were resuspended in the filtered viral supernatant  
526 supplemented with 5 µg/mL polybrene (Sigma-Aldrich, #S2667) in 6-well plates and  
527 centrifuged at 1,800 RPM for 1.5 hrs at room temperature. After spin infection, virally  
528 transduced cells were supplemented with DMEM containing 3 µg/mL doxycycline for 3

529 days before flow cytometry-assisted cell sorting or magnetic-assisted cell sorting based  
530 on hCD2 cell surface expression.

### 531 **Flow Cytometry**

532 Abl pre-B cells were arrested in G<sub>0</sub> using 3 μM imatinib (Selleck Chemicals, #S2475) for  
533 48 hours. MCF10A cells were arrested in G<sub>0</sub> by withdrawing EGF for 48 hours. To arrest  
534 cells in G<sub>2</sub>, abl pre-B cells were treated with 10 μM RO-3306 (Selleck Chemicals,  
535 #S7747) overnight. For experiments analyzing DNA-PKcs and ATM inhibition, 10 μM  
536 NU7441 (Selleck Chemicals, #S2638) or 15 μM KU-55933 (Selleck Chemicals, #S1092)  
537 was added 1 hour prior to irradiation. After irradiation with 20 Gray, cells were allowed  
538 to recover for 3 hours. Cells were then pre-extracted with 0.05% Triton-X (STI-treated  
539 abl pre-B cells), 0.2% Triton-X (proliferating abl pre-B cells) or 0.5% Triton-X (MCF10A  
540 cells) in PBS and fixed with BD Cytotfix/Cytoperm solution (BD Biosciences, #554722)  
541 containing 4.2% formaldehyde. Fixed cells were stained with anti-RPA32 (Cell Signaling  
542 Technology, #2208S) for 2 hours at room temperature, and then treated with a  
543 fluorescent conjugated secondary antibody (BioLegend, #405416 or BioLegend,  
544 #405418) for 1 hour at room temperature. 7-AAD was added to each sample to stain for  
545 DNA content. Cells were analyzed using a BD LSRII Flow Cytometer or a BD  
546 FACSCelesta and flow cytometry results were further analyzed using FlowJo.

### 547 **Nuclear RPA Immunofluorescence Staining**

548 60,000 G<sub>0</sub>-arrested MCF10A cells grown on cover slips were irradiated with 10 Gray  
549 and then allowed to recover for 3 hours at 37°C with 5% CO<sub>2</sub>. Cells were then washed  
550 with PBS containing 0.1% Tween-20 (PBST), pre-extracted using cold 0.5% Triton-X in  
551 PBS for 5 minutes, fixed with 4% formaldehyde for 15 minutes, and blocked in 3% BSA-

552 PBST for 1 hour at room temperature. Cells were incubated overnight at 4°C in primary  
553 antibody (anti-RPA32, Cell Signaling Technology, #2208). diluted in 3% BSA-PBST  
554 Samples were then washed 3x with PBST, incubated with secondary antibody diluted in  
555 3% BSA (Alexa Fluor 594 Goat anti-Rat IgG, BioLegend, #405422) in the dark for 1 hr  
556 at room temperature, washed 3x with PBST, and mounted in Prolong Gold Antifade  
557 Mountant with DAPI (Life Technologies, #P-36931). Images were taken using a Biotek  
558 Lionheart Automatic Microscope and foci quantification was performed using Biotek  
559 Gen5 software.

#### 560 **END-Seq and RPA ChIP-Seq**

561 Sequencing assays were performed in *Lig4*<sup>-/-</sup> abl pre-B cells after arrest in G<sub>0</sub> with imatinib  
562 for 24 hours or arrest in G<sub>2</sub> with RO-3306 for 12 hours, then treated with doxycycline for  
563 24 hours followed by tamoxifen treatment for 4 or 8 hours to induce AsiSI breaks in the  
564 nucleus. End-seq was performed as previously described (Canela et al. 2016; Chen et al.  
565 2021a; Wong et al. 2021). Cells were embedded in agarose plugs, lysed, and treated with  
566 proteinase K and RNase A. The DNA was then blunted with ExoVII (NEB) and ExoT  
567 (NEB), A-tailed, and ligated with a biotinylated hairpin adaptor. DNA was then recovered  
568 and sonicated to a length between 150 and 200 bp and biotinylated DNA fragments were  
569 purified using streptavidin beads (MyOne C1, Invitrogen). The DNA was then end-  
570 repaired and ligated to hairpin adaptor BU2 and amplified by PCR. RPA single-strand  
571 DNA sequencing was performed as previously described (Paiano et al. 2021). Cells were  
572 fixed in 1% formaldehyde (Sigma, F1635) for 10 min at 37°C, quenched with 125 mM  
573 glycine (Sigma), washed twice with cold 1× PBS. After centrifugation, pellets were frozen  
574 on dry ice, and stored at -80°C. Sonication, immunoprecipitation, and library preparation

575 were performed as previously detailed (Tubbs et al. 2018). Before immunoprecipitation,  
576 sheared chromatin was precleared with 40  $\mu$ L of Dynabeads Protein A (Thermo Fisher)  
577 for 30 min at 4°C. Sheared chromatin was enriched with 10  $\mu$ g of anti-RPA32/RPA2  
578 antibody (Abcam, ab10359) on Dynabeads Protein A overnight at 4°C. During library  
579 preparation, kinetic enrichment of single-strand DNA was performed by heating sheared  
580 DNA for 3 min at 95°C and allowing DNA to return to room temperature (Tubbs et al.  
581 2018). All END-seq and RPA ChIP-seq libraries were collected by gel purification and  
582 quantified using qPCR. Sequencing was performed on the Illumina NextSeq500 (75  
583 cycles) as previously described (Chen et al. 2021a).

#### 584 **Genome Alignment and Visualization**

585 END-seq and RPA ChIP-seq single-end reads were aligned to the mouse genome  
586 (mm10) using Bowtie v1.1.2 (Langmead et al. 2009) with parameters (-n 3 -k 1 -l 50) for  
587 END-seq and (-n 2 -m 1 -l 50) for RPA ChIP-seq. All plots or analysis were done for the  
588 top 200 *AsiS* sites determined by END-seq. Alignment files were generated and sorted  
589 using SAMtools (Li et al. 2009b) and converted to bedgraph files using bedtools  
590 genomecov (Quinlan and Hall 2010) following by bedGraphToBigWig to make a bigwig  
591 file (Kent et al. 2010). Visualization of genomic profiles was done by the UCSC genome  
592 browser (Kent et al. 2002) and normalized to present RPM. Heat maps were produced  
593 using the R package pheatmap.

#### 594 **Guide RNA Library Screen**

595 144 million *Lig4*<sup>-/-</sup> abl pre-B cells were transduced with a viral tet-inducible guide RNA  
596 library (Pooled Library #67988, Addgene) containing 90,000 gRNAs targeting over  
597 18,000 mouse genes. 3 days post-infection, cells were sorted for gRNA vector

598 expression using a BD FACSAria flow assisted cell sorter. The next day, sorted cells  
599 were treated with 3 µg/ml doxycycline to induce gRNA expression. 7 days later, cells  
600 were treated with Gleevec to arrest cells in G<sub>0</sub>. 48 hours later, cells were irradiated with  
601 20 Gray and allowed to recover for 2 hours. After collection, cells were permeabilized,  
602 fixed, and stained with anti-RPA32 in the same manner as described in the Flow  
603 Cytometry section. After staining, the top 10% and bottom 10% of RPA stained cells  
604 were collected using flow assisted cell sorting and genomic DNA was extracted. An  
605 Illumina sequencing library was generated using two rounds of PCR to amplify the  
606 gRNA and add a barcode, then purified PCR products containing the barcoded enriched  
607 gRNAs were sequenced on an Illumina HiSeq2500. Sequencing data were processed  
608 as previously described (Chen et al. 2021a).

### 609 **Western Blotting**

610 The following antibodies were used for western blot analysis: CtIP (gift from Dr. Richard  
611 Baer, [Columbia University, New York], 1:1000), MRE11 (Novus Biologicals, NB100-  
612 142, 1:2000), GAPDH (Sigma, G8795, 1:10,000), DNA-PK (Invitrogen, MA5-32192,  
613 1:1000), KAP1 (Genetex, GTX102226, 1:2000), KU70 (Cell Signaling Technology,  
614 #4588, 1:1000).

### 615 **Plasmid Constructs**

616 pCW-Cas9 was a gift from Eric Lander and David Sabatini (Addgene plasmid #50661)  
617 (Wang et al. 2014). pKLV-U6gRNA(BbsI)-PGKpuro2ABFP was a gift from Kosuke Yusa  
618 (Addgene plasmid #50946) (Koike-Yusa et al. 2014). Mouse Improved Genome-wide  
619 Knockout CRISPR Library v2 was a gift from Kosuke Yusa (Addgene #67988) (Tzelepis  
620 et al. 2016).

621 **Acknowledgements**

622 The authors thank Chitra Mohan for designing the model graphic and Yinan Wang for  
623 performing the bioinformatics for the high throughput screen. We thank the Weill Cornell  
624 Flow Cytometry Core for flow cytometry and thank the Weill Cornell Epigenomics Core  
625 for providing advice and performing the sequencing for the high throughput screen. JKT  
626 is supported by NIH R35 GM139816 and R01 CA95641. BPS is supported by NIH R01  
627 AI047829 and R01 AI074953. FCF is supported by NIH F31 CA239442. JKT and BPS  
628 were also supported by the Starr Cancer Consortium and Emerson Collective Cancer  
629 Research Fund.

630

631

632

633

634

635

636 **References**

- 637 Averbeck NB, Ringel O, Herrlitz M, Jakob B, Durante M, Taucher-Scholz G. 2014. DNA  
638 end resection is needed for the repair of complex lesions in G1-phase human  
639 cells. *Cell Cycle* **13**: 2509-2516.
- 640 Barlow JH, Lisby M, Rothstein R. 2008. Differential regulation of the cellular response to  
641 DNA double-strand breaks in G1. *Mol Cell* **30**: 73-85.
- 642 Bartlett EJ, Lees-Miller SP. 2018. Established and Emerging Roles of the DNA-  
643 Dependent Protein Kinase Catalytic Subunit (DNA-PKcs). in *Targeting the DNA*  
644 *Damage Response for Anti-Cancer Therapy* (eds. J Pollard, N Curtin), pp. 315-  
645 338. Springer International Publishing, Cham.
- 646 Biehs R, Steinlage M, Barton O, Juhász S, Künzel J, Spies J, Shibata A, Jeggo PA,  
647 Löbrich M. 2017. DNA Double-Strand Break Resection Occurs during Non-  
648 homologous End Joining in G1 but Is Distinct from Resection during Homologous  
649 Recombination. *Mol Cell* **65**: 671-684.e675.
- 650 Blackford AN, Jackson SP. 2017. ATM, ATR, and DNA-PK: The Trinity at the Heart of  
651 the DNA Damage Response. *Mol Cell* **66**: 801-817.
- 652 Bredemeyer AL, Sharma GG, Huang CY, Helmink BA, Walker LM, Khor KC, Nuskey B,  
653 Sullivan KE, Pandita TK, Bassing CH et al. 2006. ATM stabilizes DNA double-  
654 strand-break complexes during V(D)J recombination. *Nature* **442**: 466-470.
- 655 Britton S, Chanut P, Delteil C, Barboule N, Frit P, Calsou P. 2020. ATM antagonizes  
656 NHEJ proteins assembly and DNA-ends synapsis at single-ended DNA double  
657 strand breaks. *Nucleic Acids Res* **48**: 9710-9723.
- 658 Bunting SF, Callén E, Wong N, Chen HT, Polato F, Gunn A, Bothmer A, Feldhahn N,  
659 Fernandez-Capetillo O, Cao L et al. 2010. 53BP1 inhibits homologous  
660 recombination in Brca1-deficient cells by blocking resection of DNA breaks. *Cell*  
661 **141**: 243-254.
- 662 Canela A, Sridharan S, Sciascia N, Tubbs A, Meltzer P, Sleckman BP, Nussenzweig A.  
663 2016. DNA Breaks and End Resection Measured Genome-wide by End  
664 Sequencing. *Mol Cell* **63**: 898-911.
- 665 Chaplin AK, Hardwick SW, Liang S, Kefala Stavridi A, Hnizda A, Cooper LR, De Oliveira  
666 TM, Chirgadze DY, Blundell TL. 2021. Dimers of DNA-PK create a stage for DNA  
667 double-strand break repair. *Nat Struct Mol Biol* **28**: 13-19.
- 668 Chen BR, Wang Y, Tubbs A, Zong D, Fowler FC, Zolnerowich N, Wu W, Bennett A,  
669 Chen CC, Feng W et al. 2021a. LIN37-DREAM prevents DNA end resection and  
670 homologous recombination at DNA double-strand breaks in quiescent cells. *Elife*  
671 **10**.
- 672 Chen X, Xu X, Chen Y, Cheung JC, Wang H, Jiang J, de Val N, Fox T, Gellert M, Yang  
673 W. 2021b. Structure of an activated DNA-PK and its implications for NHEJ. *Mol*  
674 *Cell* **81**: 801-810.e803.
- 675 Clerici M, Mantiero D, Guerini I, Lucchini G, Longhese MP. 2008. The Yku70-Yku80  
676 complex contributes to regulate double-strand break processing and checkpoint  
677 activation during the cell cycle. *EMBO Rep* **9**: 810-818.
- 678 Dev H, Chiang TW, Lescale C, de Krijger I, Martin AG, Pilger D, Coates J, Sczaniecka-  
679 Clift M, Wei W, Ostermaier M et al. 2018. Shieldin complex promotes DNA end-  
680 joining and counters homologous recombination in BRCA1-null cells. *Nat Cell*  
681 *Biol* **20**: 954-965.



- 682 Feng L, Chen J. 2012. The E3 ligase RNF8 regulates KU80 removal and NHEJ repair.  
683 *Nat Struct Mol Biol* **19**: 201-206.
- 684 Forment JV, Walker RV, Jackson SP. 2012. A high-throughput, flow cytometry-based  
685 method to quantify DNA-end resection in mammalian cells. *Cytometry A* **81**: 922-  
686 928.
- 687 Golub EI, Gupta RC, Haaf T, Wold MS, Radding CM. 1998. Interaction of human rad51  
688 recombination protein with single-stranded DNA binding protein, RPA. *Nucleic  
689 Acids Res* **26**: 5388-5393.
- 690 Gottlieb TM, Jackson SP. 1993. The DNA-dependent protein kinase: requirement for  
691 DNA ends and association with Ku antigen. *Cell* **72**: 131-142.
- 692 Gravel S, Chapman JR, Magill C, Jackson SP. 2008. DNA helicases Sgs1 and BLM  
693 promote DNA double-strand break resection. *Genes Dev* **22**: 2767-2772.
- 694 Hammarsten O, Chu G. 1998. DNA-dependent protein kinase: DNA binding and  
695 activation in the absence of Ku. *Proc Natl Acad Sci U S A* **95**: 525-530.
- 696 Ishida N, Nakagawa T, Iemura SI, Yasui A, Shima H, Katoh Y, Nagasawa Y, Natsume  
697 T, Igarashi K, Nakayama K. 2017. Ubiquitylation of Ku80 by RNF126 Promotes  
698 Completion of Nonhomologous End Joining-Mediated DNA Repair. *Mol Cell Biol*  
699 **37**.
- 700 Ismail IH, Gagné JP, Genois MM, Strickfaden H, McDonald D, Xu Z, Poirier GG,  
701 Masson JY, Hendzel MJ. 2015. The RNF138 E3 ligase displaces Ku to promote  
702 DNA end resection and regulate DNA repair pathway choice. *Nat Cell Biol* **17**:  
703 1446-1457.
- 704 Jackson SP, Bartek J. 2009. The DNA-damage response in human biology and  
705 disease. *Nature* **461**: 1071-1078.
- 706 Kent WJ, Sugnet CW, Furey TS, Roskin KM, Pringle TH, Zahler AM, Haussler D. 2002.  
707 The human genome browser at UCSC. *Genome Res* **12**: 996-1006.
- 708 Kent WJ, Zweig AS, Barber G, Hinrichs AS, Karolchik D. 2010. BigWig and BigBed:  
709 enabling browsing of large distributed datasets. *Bioinformatics* **26**: 2204-2207.
- 710 Koike-Yusa H, Li Y, Tan EP, Velasco-Herrera MeC, Yusa K. 2014. Genome-wide  
711 recessive genetic screening in mammalian cells with a lentiviral CRISPR-guide  
712 RNA library. *Nat Biotechnol* **32**: 267-273.
- 713 Langmead B, Trapnell C, Pop M, Salzberg SL. 2009. Ultrafast and memory-efficient  
714 alignment of short DNA sequences to the human genome. *Genome Biol* **10**: R25.
- 715 Lee SE, Moore JK, Holmes A, Umezue K, Kolodner RD, Haber JE. 1998.  
716 *Saccharomyces* Ku70, mre11/rad50 and RPA proteins regulate adaptation to  
717 G2/M arrest after DNA damage. *Cell* **94**: 399-409.
- 718 Li H, Handsaker B, Wysoker A, Fennell T, Ruan J, Homer N, Marth G, Abecasis G,  
719 Durbin R, Genome Project Data Processing S. 2009a. The Sequence  
720 Alignment/Map format and SAMtools. *Bioinformatics* **25**: 2078-2079.
- 721 Li H, Handsaker B, Wysoker A, Fennell T, Ruan J, Homer N, Marth G, Abecasis G,  
722 Durbin R, Subgroup GPDP. 2009b. The Sequence Alignment/Map format and  
723 SAMtools. *Bioinformatics* **25**: 2078-2079.
- 724 Ma Y, Pannicke U, Schwarz K, Lieber MR. 2002. Hairpin opening and overhang  
725 processing by an Artemis/DNA-dependent protein kinase complex in  
726 nonhomologous end joining and V(D)J recombination. *Cell* **108**: 781-794.



- 727 Ma Y, Schwarz K, Lieber MR. 2005. The Artemis:DNA-PKcs endonuclease cleaves  
728 DNA loops, flaps, and gaps. *DNA Repair (Amst)* **4**: 845-851.
- 729 Menon V, Povirk LF. 2016. End-processing nucleases and phosphodiesterases: An elite  
730 supporting cast for the non-homologous end joining pathway of DNA double-  
731 strand break repair. *DNA Repair (Amst)* **43**: 57-68.
- 732 Mimitou EP, Symington LS. 2008. Sae2, Exo1 and Sgs1 collaborate in DNA double-  
733 strand break processing. *Nature* **455**: 770-774.
- 734 Mirman Z, Lotterberger F, Takai H, Kibe T, Gong Y, Takai K, Bianchi A, Zimmermann  
735 M, Durocher D, de Lange T. 2018. 53BP1-RIF1-shieldin counteracts DSB  
736 resection through CST- and Pol $\alpha$ -dependent fill-in. *Nature* **560**: 112-116.
- 737 Noordermeer SM, Adam S, Setiapura D, Barazas M, Pettitt SJ, Ling AK, Olivieri M,  
738 Álvarez-Quilón A, Moatti N, Zimmermann M et al. 2018. The shieldin complex  
739 mediates 53BP1-dependent DNA repair. *Nature* **560**: 117-121.
- 740 Paiano J, Zolnerowich N, Wu W, Pavani R, Wang C, Li H, Zheng L, Shen B, Sleckman  
741 BP, Chen BR et al. 2021. Role of 53BP1 in end protection and DNA synthesis at  
742 DNA breaks. *Genes Dev* **35**: 1356-1367.
- 743 Paull TT, Gellert M. 1998. The 3' to 5' exonuclease activity of Mre 11 facilitates repair of  
744 DNA double-strand breaks. *Mol Cell* **1**: 969-979.
- 745 Postow L, Funabiki H. 2013. An SCF complex containing Fbx12 mediates DNA  
746 damage-induced Ku80 ubiquitylation. *Cell Cycle* **12**: 587-595.
- 747 Postow L, Ghenoiu C, Woo EM, Krutchinsky AN, Chait BT, Funabiki H. 2008. Ku80  
748 removal from DNA through double strand break-induced ubiquitylation. *J Cell Biol*  
749 **182**: 467-479.
- 750 Quinlan AR, Hall IM. 2010. BEDTools: a flexible suite of utilities for comparing genomic  
751 features. *Bioinformatics* **26**: 841-842.
- 752 San Filippo J, Sung P, Klein H. 2008. Mechanism of eukaryotic homologous  
753 recombination. *Annu Rev Biochem* **77**: 229-257.
- 754 Sartori AA, Lukas C, Coates J, Mistrik M, Fu S, Bartek J, Baer R, Lukas J, Jackson SP.  
755 2007. Human CtIP promotes DNA end resection. *Nature* **450**: 509-514.
- 756 Scully R, Panday A, Elango R, Willis NA. 2019. DNA double-strand break repair-  
757 pathway choice in somatic mammalian cells. *Nat Rev Mol Cell Biol* **20**: 698-714.
- 758 Setiapura D, Durocher D. 2019. Shieldin - the protector of DNA ends. *EMBO Rep* **20**.
- 759 Shao Z, Davis AJ, Fattah KR, So S, Sun J, Lee KJ, Harrison L, Yang J, Chen DJ. 2012.  
760 Persistently bound Ku at DNA ends attenuates DNA end resection and  
761 homologous recombination. *DNA Repair (Amst)* **11**: 310-316.
- 762 Shen W, Le S, Li Y, Hu F. 2016. SeqKit: A Cross-Platform and Ultrafast Toolkit for  
763 FASTA/Q File Manipulation. *PLoS One* **11**: e0163962.
- 764 Stiff T, O'Driscoll M, Rief N, Iwabuchi K, Löbrich M, Jeggo PA. 2004. ATM and DNA-PK  
765 function redundantly to phosphorylate H2AX after exposure to ionizing radiation.  
766 *Cancer Res* **64**: 2390-2396.
- 767 Sugiyama T, Kowalczykowski SC. 2002. Rad52 protein associates with replication  
768 protein A (RPA)-single-stranded DNA to accelerate Rad51-mediated  
769 displacement of RPA and presynaptic complex formation. *J Biol Chem* **277**:  
770 31663-31672.
- 771 Symington LS, Gautier J. 2011. Double-strand break end resection and repair pathway  
772 choice. *Annu Rev Genet* **45**: 247-271.

- 773 Tkáč J, Xu G, Adhikary H, Young JTF, Gallo D, Escribano-Díaz C, Krietsch J, Orthwein  
774 A, Munro M, Sol W et al. 2016. HELB Is a Feedback Inhibitor of DNA End  
775 Resection. *Mol Cell* **61**: 405-418.
- 776 Trujillo KM, Yuan SS, Lee EY, Sung P. 1998. Nuclease activities in a complex of human  
777 recombination and DNA repair factors Rad50, Mre11, and p95. *J Biol Chem* **273**:  
778 21447-21450.
- 779 Tubbs A, Sridharan S, van Wietmarschen N, Maman Y, Callen E, Stanlie A, Wu W, Wu  
780 X, Day A, Wong N et al. 2018. Dual Roles of Poly(dA:dT) Tracts in Replication  
781 Initiation and Fork Collapse. *Cell* **174**: 1127-1142.e11119.
- 782 Tzelepis K, Koike-Yusa H, De Braekeleer E, Li Y, Metzakopian E, Dovey OM, Mupo A,  
783 Grinkevich V, Li M, Mazan M et al. 2016. A CRISPR Dropout Screen Identifies  
784 Genetic Vulnerabilities and Therapeutic Targets in Acute Myeloid Leukemia. *Cell*  
785 *Rep* **17**: 1193-1205.
- 786 Wang H, Shi LZ, Wong CC, Han X, Hwang PY, Truong LN, Zhu Q, Shao Z, Chen DJ,  
787 Berns MW et al. 2013. The interaction of CtIP and Nbs1 connects CDK and ATM  
788 to regulate HR-mediated double-strand break repair. *PLoS Genet* **9**: e1003277.
- 789 Wang T, Wei JJ, Sabatini DM, Lander ES. 2014. Genetic screens in human cells using  
790 the CRISPR-Cas9 system. *Science* **343**: 80-84.
- 791 Weinfeld M, Soderlind KJ. 1991. 32P-postlabeling detection of radiation-induced DNA  
792 damage: identification and estimation of thymine glycols and phosphoglycolate  
793 termini. *Biochemistry* **30**: 1091-1097.
- 794 Wong N, John S, Nussenzweig A, Canela A. 2021. END-seq: An Unbiased, High-  
795 Resolution, and Genome-Wide Approach to Map DNA Double-Strand Breaks  
796 and Resection in Human Cells. *Methods Mol Biol* **2153**: 9-31.
- 797 Wright WD, Shah SS, Heyer WD. 2018. Homologous recombination and the repair of  
798 DNA double-strand breaks. *J Biol Chem* **293**: 10524-10535.
- 799 Yaneva M, Kowalewski T, Lieber MR. 1997. Interaction of DNA-dependent protein  
800 kinase with DNA and with Ku: biochemical and atomic-force microscopy studies.  
801 *EMBO J* **16**: 5098-5112.
- 802 Zahid S, Seif El Dahan M, Iehl F, Fernandez-Varela P, Le Du MH, Ropars V,  
803 Charbonnier JB. 2021. The Multifaceted Roles of Ku70/80. *Int J Mol Sci* **22**.
- 804 Zha S, Jiang W, Fujiwara Y, Patel H, Goff PH, Brush JW, Dubois RL, Alt FW. 2011.  
805 Ataxia telangiectasia-mutated protein and DNA-dependent protein kinase have  
806 complementary V(D)J recombination functions. *Proc Natl Acad Sci U S A* **108**:  
807 2028-2033.
- 808 Zha S, Shao Z, Zhu Y. 2021. The plié by DNA-PK: dancing on DNA. *Mol Cell* **81**: 644-  
809 646.
- 810 Zhou Y, Paull TT. 2013. DNA-dependent protein kinase regulates DNA end resection in  
811 concert with Mre11-Rad50-Nbs1 (MRN) and ataxia telangiectasia-mutated  
812 (ATM). *J Biol Chem* **288**: 37112-37125.
- 813 Zhu Z, Chung WH, Shim EY, Lee SE, Ira G. 2008. Sgs1 helicase and two nucleases  
814 Dna2 and Exo1 resect DNA double-strand break ends. *Cell* **134**: 981-994.
- 815
